# Supplementary material for: Variation in a single allele drives divergent yield responses to elevated CO2 between rice subspecies
Source: PubMed Central journal article supplement — Nat Commun. 2025 Jan 3;16:376. doi: 10.1038/s41467-024-55809-3 (PMC11698830; doi:10.1038/s41467-024-55809-3), 2025-01-03
Supplement: 41467_2024_55809_MOESM1_ESM.pdf [file 41467_2024_55809_MOESM1_ESM.pdf]

## Supplementary Materials

### Supplementary method

To evaluate genetic variations between *indica* and *japonica* and their responses to eCO<sub>2</sub>, we planted a typical *indica* variety, Yangdao 6 (YD6) and a typical *japonica* variety Zhonghua 11 (ZH11) in the FACE system. The plots for each treatment were sized at 2 m × 2.5 m, with planting spaced at 15 cm × 25 cm intervals. Nitrogen fertilizer, in the form of urea, was applied at a total rate of 225 kg N ha<sup>-1</sup>. This was divided into three applications: 40% at soil tillage, 30% at the tillering stage, and the remaining 30% at the jointing stage. Phosphorus fertilizer, at a rate of 120 kg P<sub>2</sub>O<sub>5</sub> ha<sup>-1</sup>, was applied at soil tillage, while potassium fertilizer, at 160 kg K<sub>2</sub>O ha<sup>-1</sup>, was split equally between the soil tillage and jointing stages. All other agronomic practices were conducted in accordance with local agricultural recommendations. At heading stage, rice flag leaves were collected, immediately frozen and stored at -80°C for subsequent RNA extraction and sequencing (See sampling and methods).

## Supplementary Figures

**a**

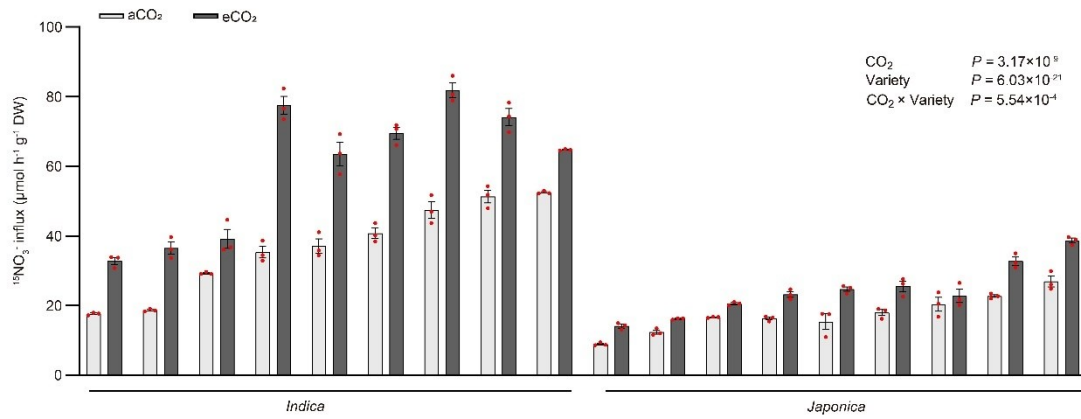

**b**

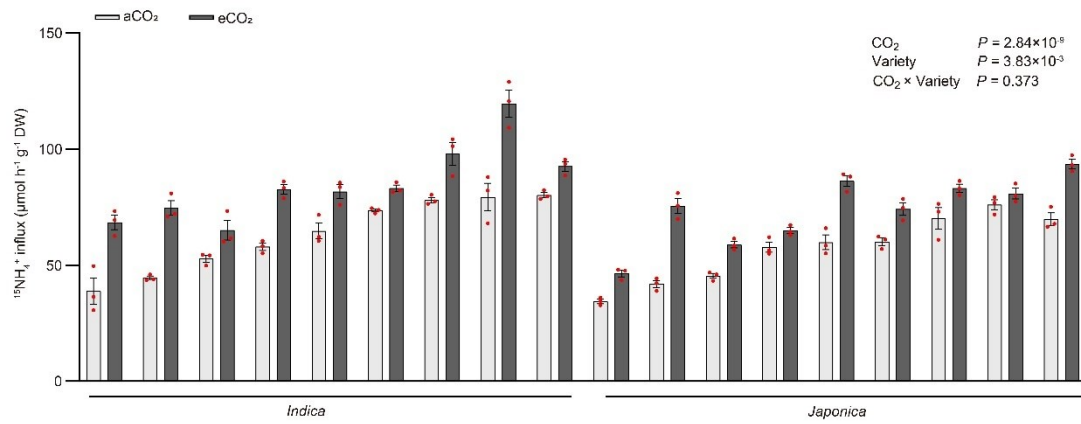

**Supplementary Fig. 1 | The influx of  $^{15}\text{NO}_3^-$  and  $^{15}\text{NH}_4^+$  absorption in *indica* and *japonica* subspecies under ambient CO<sub>2</sub> and elevated CO<sub>2</sub> conditions. a-b,  $^{15}\text{NO}_3^-$  uptake (a) and  $^{15}\text{NH}_4^+$  uptake (b), in roots of 18 *indica* and *japonica* varieties labeled with 2.5 mM  $^{15}\text{N}$ . DW, dry weight. aCO<sub>2</sub> and eCO<sub>2</sub> indicate ambient CO<sub>2</sub> (aCO<sub>2</sub>) and elevated CO<sub>2</sub> (eCO<sub>2</sub>) condition, respectively. Data are mean  $\pm$  s.e.m. ( $n = 3$  biological replicates).  $P$ -values were generated from two-way ANOVA. Source data are provided as a Source Data file.**

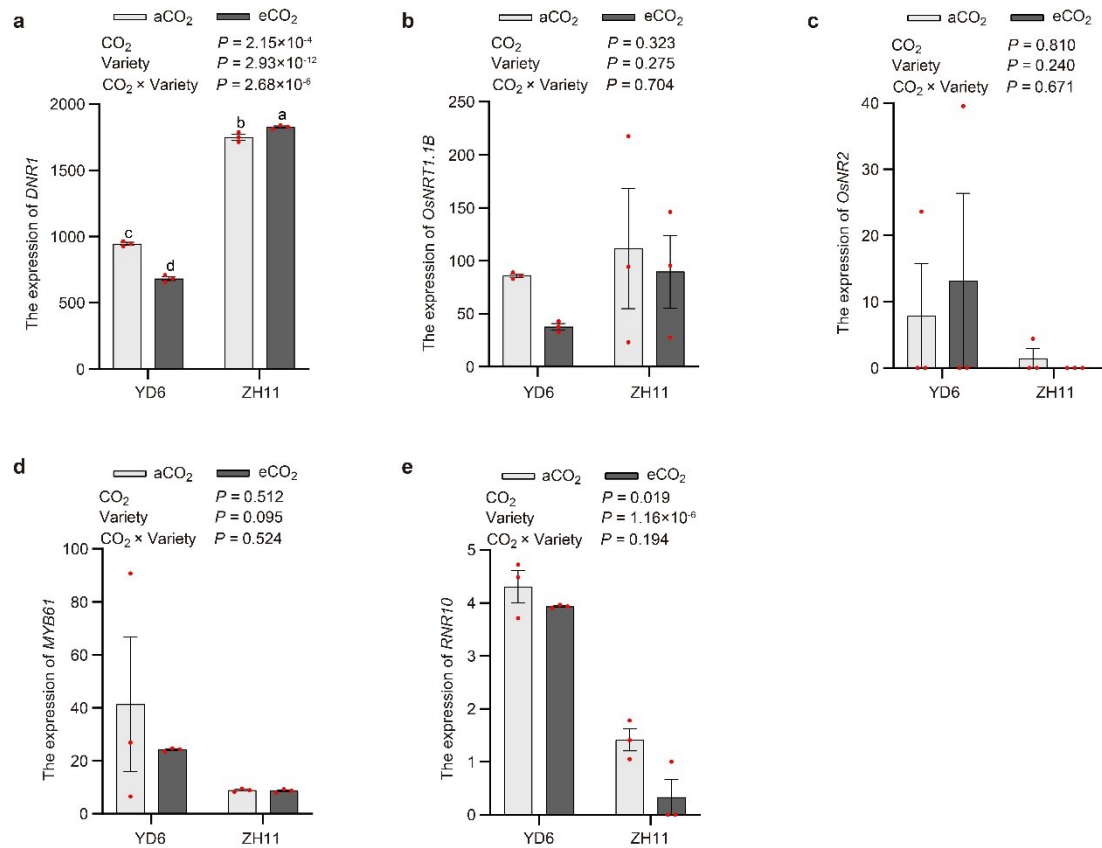

**Supplementary Fig. 2 | The expression levels of *DNR1*, *OsNRT1.1B*, *OsNR2*, *MYB61*, *RNR10* in *indica* variety Yangdao 6 and *japonica* variety Zhonghua 11 under ambient CO<sub>2</sub> and elevated CO<sub>2</sub> conditions. a-e, *DNR1* (a), *OsNRT1.1B* (b), *OsNR2* (c), *MYB61* (d), *RNR10* (e) transcript abundances in flag leaf at heading stage under ambient CO<sub>2</sub> (aCO<sub>2</sub>) and elevated CO<sub>2</sub> (eCO<sub>2</sub>) conditions. YD6 and ZH11 indicate *indica* variety Yangdao 6 and *japonica* variety Zhonghua 11, respectively. Data are mean ± s.e.m. ( $n = 3$  biological replicates).  $P$ -values were generated from two-way ANOVA. a, Different letters indicate significant differences among groups ( $P < 0.05$ ). Source data are provided as a Source Data file.**

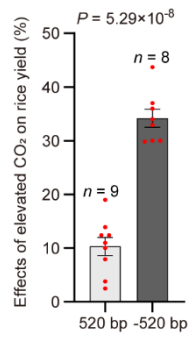

**Supplementary Fig. 3 | Differences in the effect of elevated CO<sub>2</sub> on rice yields between rice varieties carrying the *japonica* *DNRI* allele (520 bp) or *indica* *DNRI* allele (-520 bp) in FACE experiments.** *P*-values were generated from two-sided Student's *t* tests. Source data are provided as a Source Data file.

*Indica vs. Japonica*

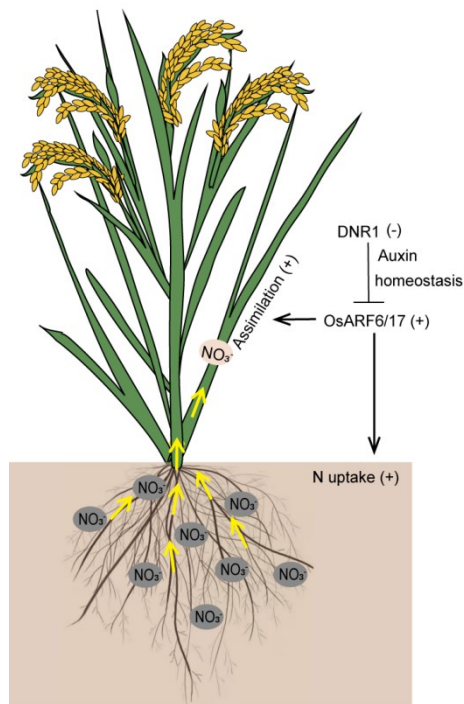

**Supplementary Fig. 4 | Schematic overview of the differences in nitrate use efficiency between *indica* and *japonica* rice, as regulated by DNR1. + and - indicate positive and negative differences in *indica* compared to *japonica*, respectively.**

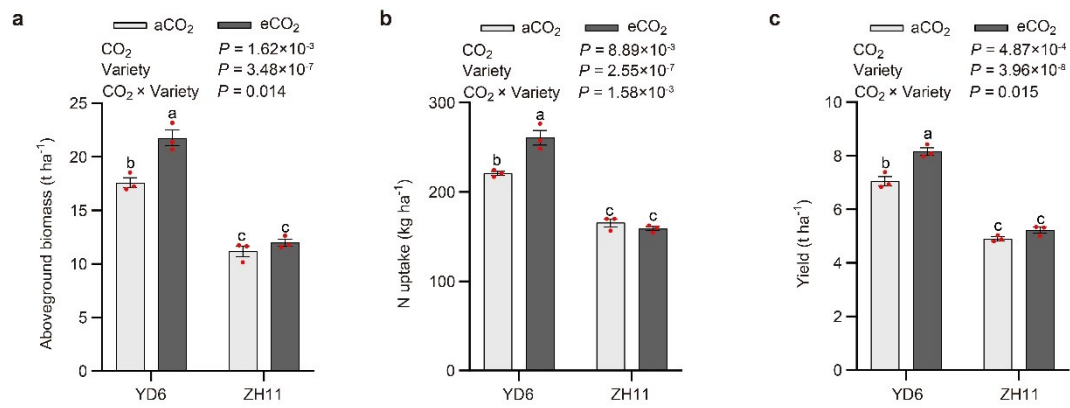

**Supplementary Fig. 5 | Different responses of *indica* variety Yangdao 6 and *japonica* variety Zhonghua 11 to elevated CO<sub>2</sub>.** a-c, Aboveground biomass (a), N uptake (b), and yield (c) under ambient CO<sub>2</sub> (aCO<sub>2</sub>) and elevated CO<sub>2</sub> (eCO<sub>2</sub>) conditions were measured at maturity stage. YD6 and ZH11 indicate *indica* variety Yangdao 6 and *japonica* variety Zhonghua 11, respectively. Data are mean ± s.e.m ( $n = 3$  biological replicates).  $P$ -values were generated from two-way ANOVA. Different letters indicate significant differences among groups ( $P < 0.05$ ). Source data are provided as a Source Data file.

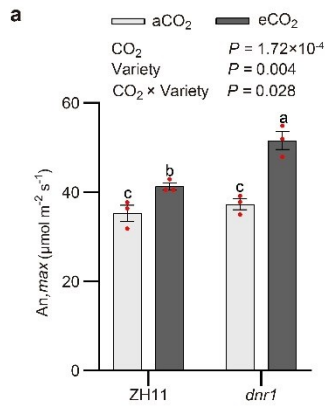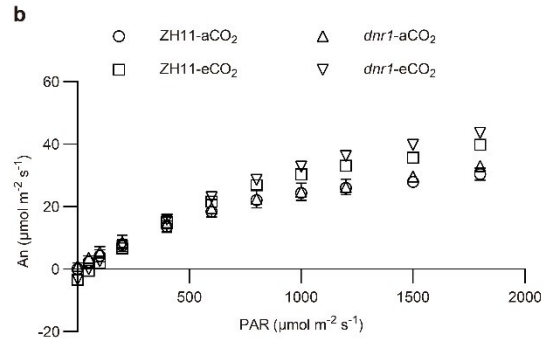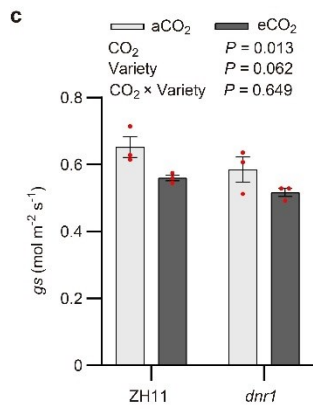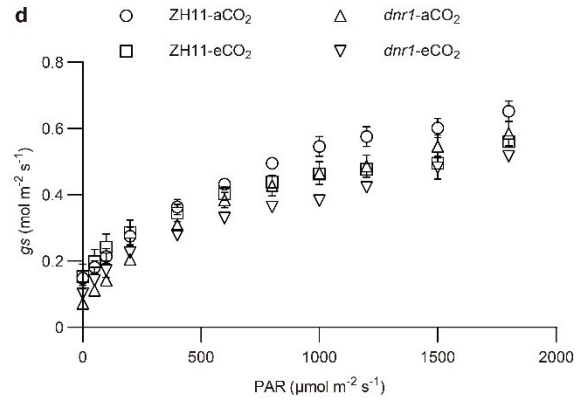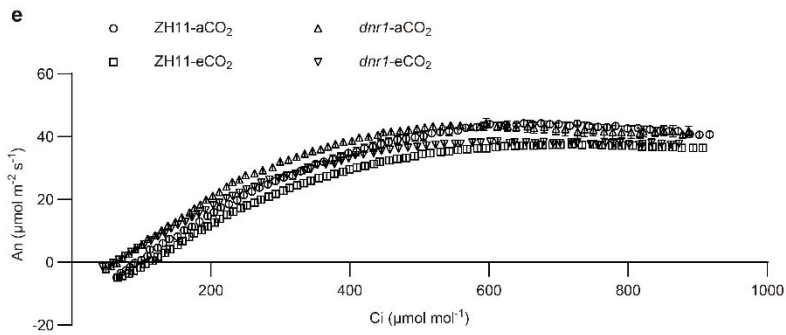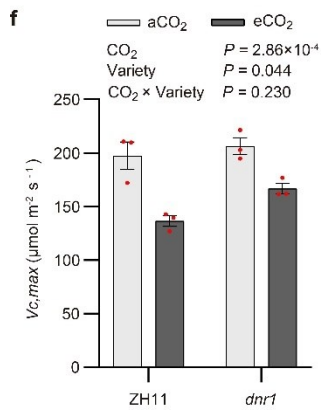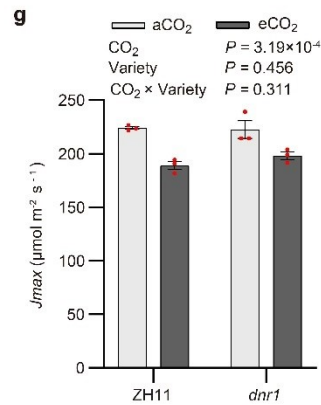

**Supplementary Fig. 6 | The responses of photosynthetic parameters to elevated CO<sub>2</sub>.** **a**, Light-saturated net photosynthesis rate. Different letters indicate significant differences among groups ( $P < 0.05$ ). **b**, Light response of net photosynthesis rate (An). **c**, Light-saturated stomatal conductance (gs). **d**, Light response of stomatal conductance (gs). **e**, CO<sub>2</sub> response of net photosynthesis rate (An). **f**, Maximum rate of RuBP carboxylation ( $V_{c,max}$ ). **g**, Maximum rate of electron transport driving RuBP regeneration ( $J_{max}$ ). ZH11 and *dnr1* indicate *japonica* variety Zhonghua 11 and its *dnr1* mutants mimicking the *indica* *DNR1* allele, respectively. aCO<sub>2</sub> and eCO<sub>2</sub> indicate ambient CO<sub>2</sub> and elevated CO<sub>2</sub> condition, respectively. **a**, **c**, **f-g**, Data are mean  $\pm$  s.e.m. ( $n = 3$  biological replicates).  $P$ -values were generated from two-way ANOVA. Source data are provided as a Source Data file.



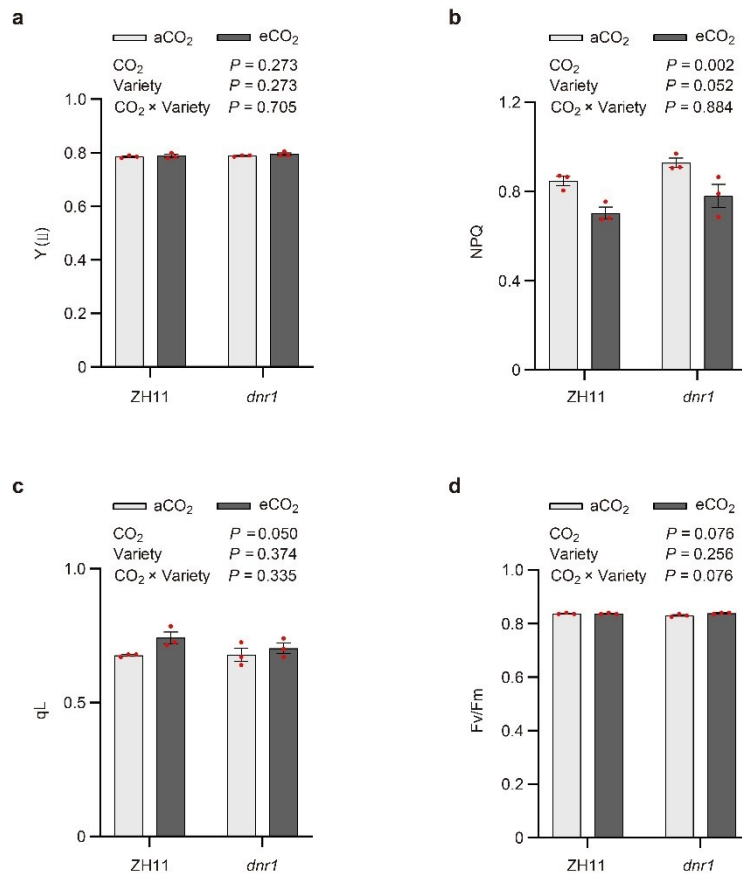

**Supplementary Fig. 7 | The responses of chlorophyll fluorescence parameters to elevated CO<sub>2</sub>.** **a**, Quantum yield of Photosystem II (Y(II)). **b**, Non-photochemical quenching (NPQ). **c**, Photochemical quenching coefficient (qL). **d**, Maximum photochemical quantum yield of Photosystem II (Fv/Fm). ZH11 and *dnr1* indicate *japonica* variety Zhonghua 11 and its *dnr1* mutants mimicking the *indica* *DNRI* allele, respectively. aCO<sub>2</sub> and eCO<sub>2</sub> indicate ambient CO<sub>2</sub> and elevated CO<sub>2</sub> condition, respectively. **a-d**, Data are mean ± s.e.m. ( $n = 3$  biological replicates).  $P$ -values were generated from two-way ANOVA. Source data are provided as a Source Data file.

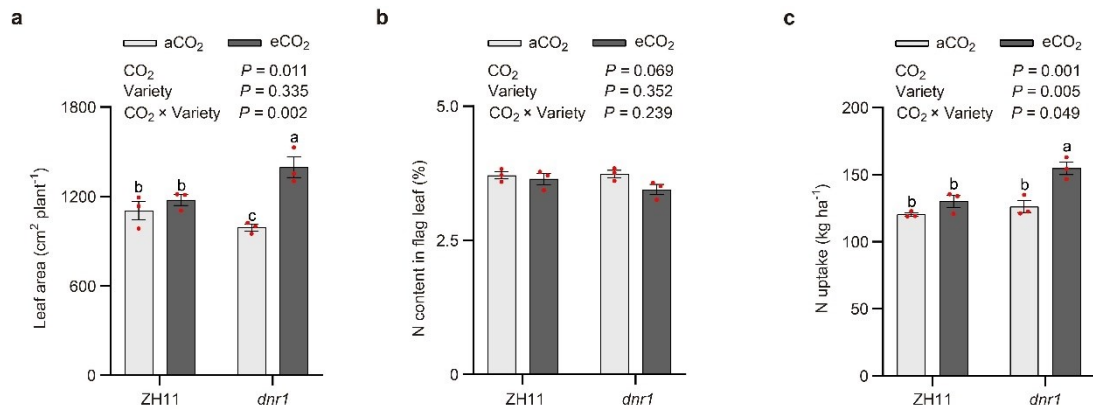

**Supplementary Fig. 8 | Different responses of *japonica* variety Zhonghua 11 and its *dnr1* mutants mimicking the *indica* *DNR1* allele to elevated CO<sub>2</sub>.** a-c, Total leaf area per plant (a), flag leaf N content (b), and N uptake (c) under ambient CO<sub>2</sub> (aCO<sub>2</sub>) and elevated CO<sub>2</sub> (eCO<sub>2</sub>) conditions. All these variables were measured at the heading stage. ZH11 and *dnr1* indicate *japonica* variety Zhonghua 11 and its *dnr1* mutants, respectively. Data are mean ± s.e.m. ( $n = 3$  biological replicates).  $P$ -values were generated from two-way ANOVA. a, c, Different letters indicate significant differences among groups ( $P < 0.05$ ). Source data are provided as a Source Data file.

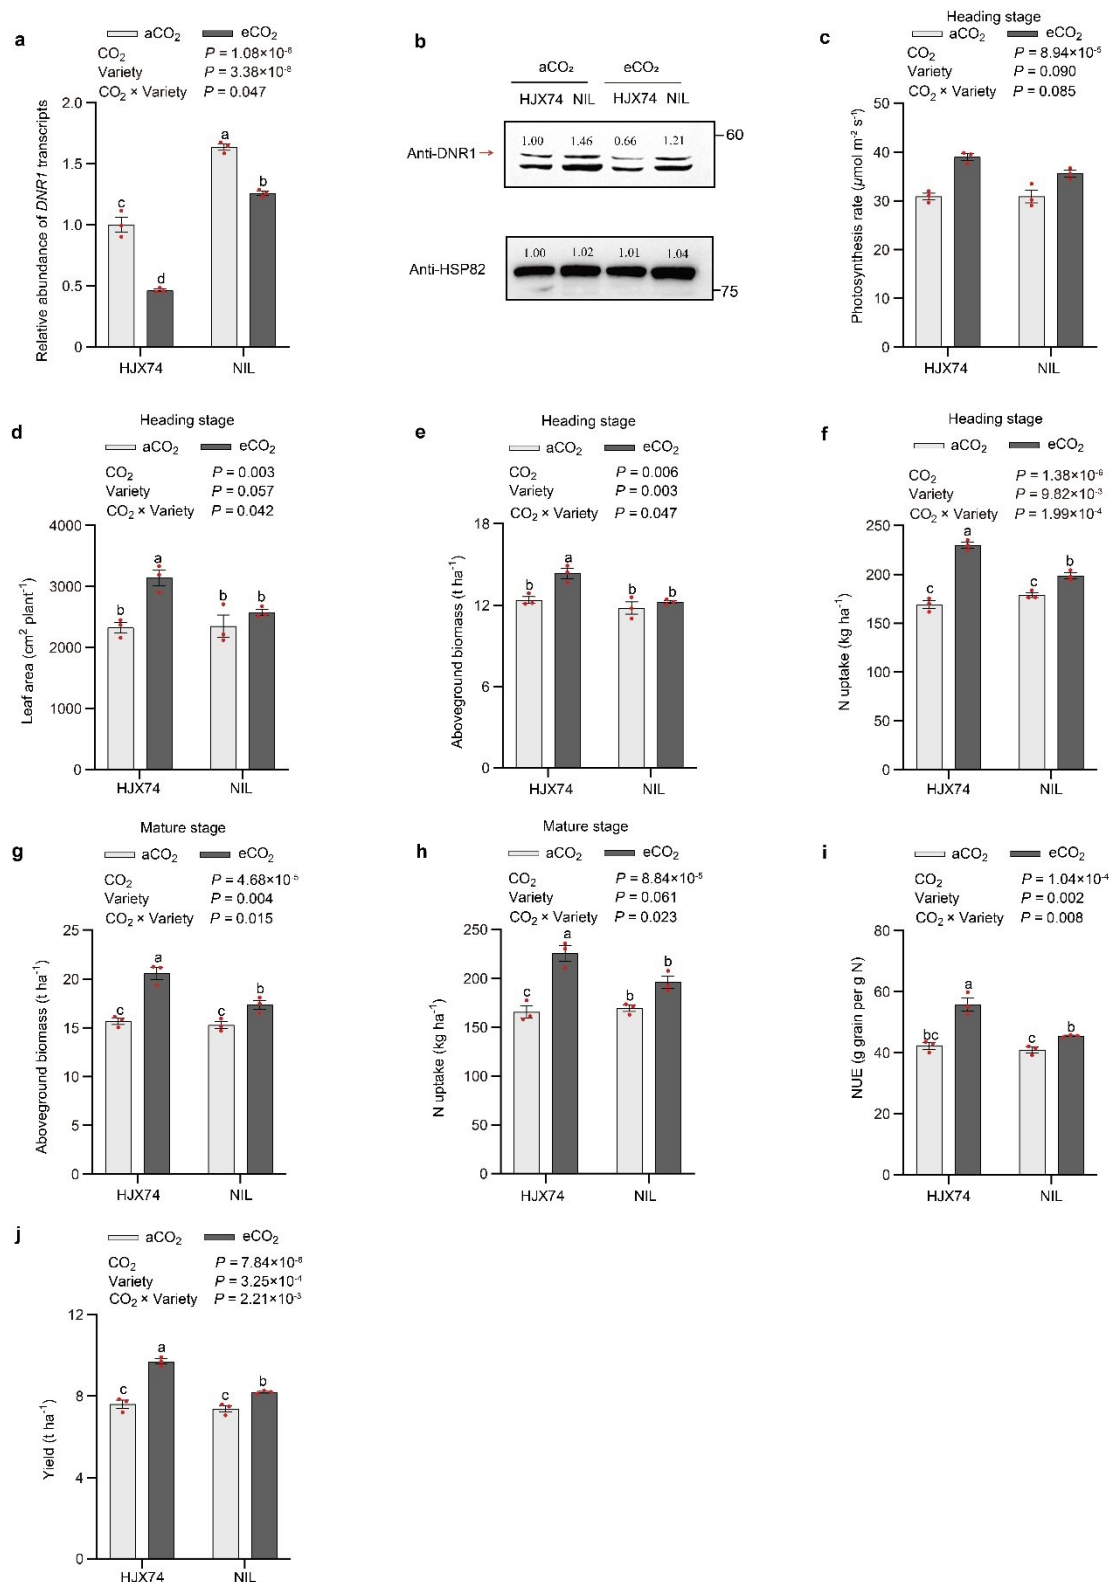

**Supplementary Fig. 9 | Different responses of *indica* variety Hua-Jing-Xian 74 and the near-isogenic line carrying the *japonica* *DNR1* allele to elevated  $CO_2$  in 2023. a**, *DNR1* transcript abundance in shoots under ambient  $CO_2$  (aCO<sub>2</sub>) and elevated  $CO_2$  (eCO<sub>2</sub>) conditions, respectively. Transcript abundance was measured relative to Hua-Jing-Xian 74 under aCO<sub>2</sub> (set to 1). **b**, *DNR1* protein abundance in shoots. HSP82 serves as a loading control. The red arrowhead indicates the

DNR1 bands. **c-f**, Net photosynthesis rate of flag leaves (**c**), total leaf area per plant (**d**), aboveground biomass (**e**), and N uptake (**f**) under aCO<sub>2</sub> and eCO<sub>2</sub> conditions were measured at heading stage. **g-j**, Aboveground biomass (**g**), N uptake (**h**), N-use efficiency (**i**), yield (**j**) under aCO<sub>2</sub> and eCO<sub>2</sub> conditions were measured at maturity. HJX74 and NIL indicate *indica* variety Hua-Jing-Xian 74 and the near-isogenic line carrying the *japonica DNR1* allele, respectively. **a, c-j**, Data are mean ± s.e.m. ( $n = 3$  biological replicates). *P*-values were generated from two-way ANOVA. **a, d-j**, Different letters indicate significant differences among groups ( $P < 0.05$ ). Source data are provided as a Source Data file.

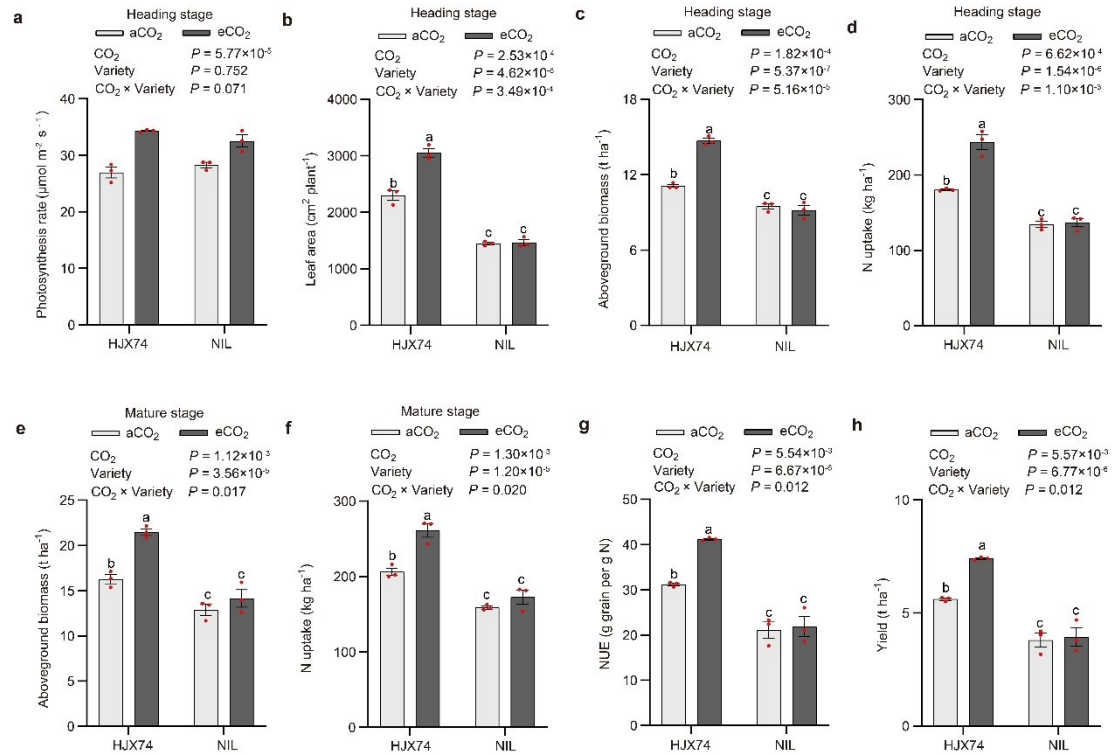

**Supplementary Fig. 10 | Different responses of *indica* variety Hua-Jing-Xian 74 and the near-isogenic line carrying the *japonica DNRI* allele to elevated CO<sub>2</sub> in 2022.** **a-d**, Net photosynthesis rate of flag leaves (**a**), total leaf area per plant (**b**), aboveground biomass (**c**), and N uptake (**d**) under aCO<sub>2</sub> and eCO<sub>2</sub> conditions were measured at heading stage. **e-h**, Aboveground biomass (**e**), N uptake (**f**), N-use efficiency (**g**) and yield (**h**) under aCO<sub>2</sub> and eCO<sub>2</sub> conditions were measured at maturity. HJX74 and NIL indicate *indica* variety Hua-Jing-Xian 74 and the near-isogenic line carrying the *japonica DNRI* allele, respectively. **a-h**, Data are mean  $\pm$  s.e.m. ( $n = 3$  biological replicates).  $P$ -values were generated from two-way ANOVA. **b-h**, Different letters indicate significant differences among groups ( $P < 0.05$ ). Source data are provided as a Source Data file.

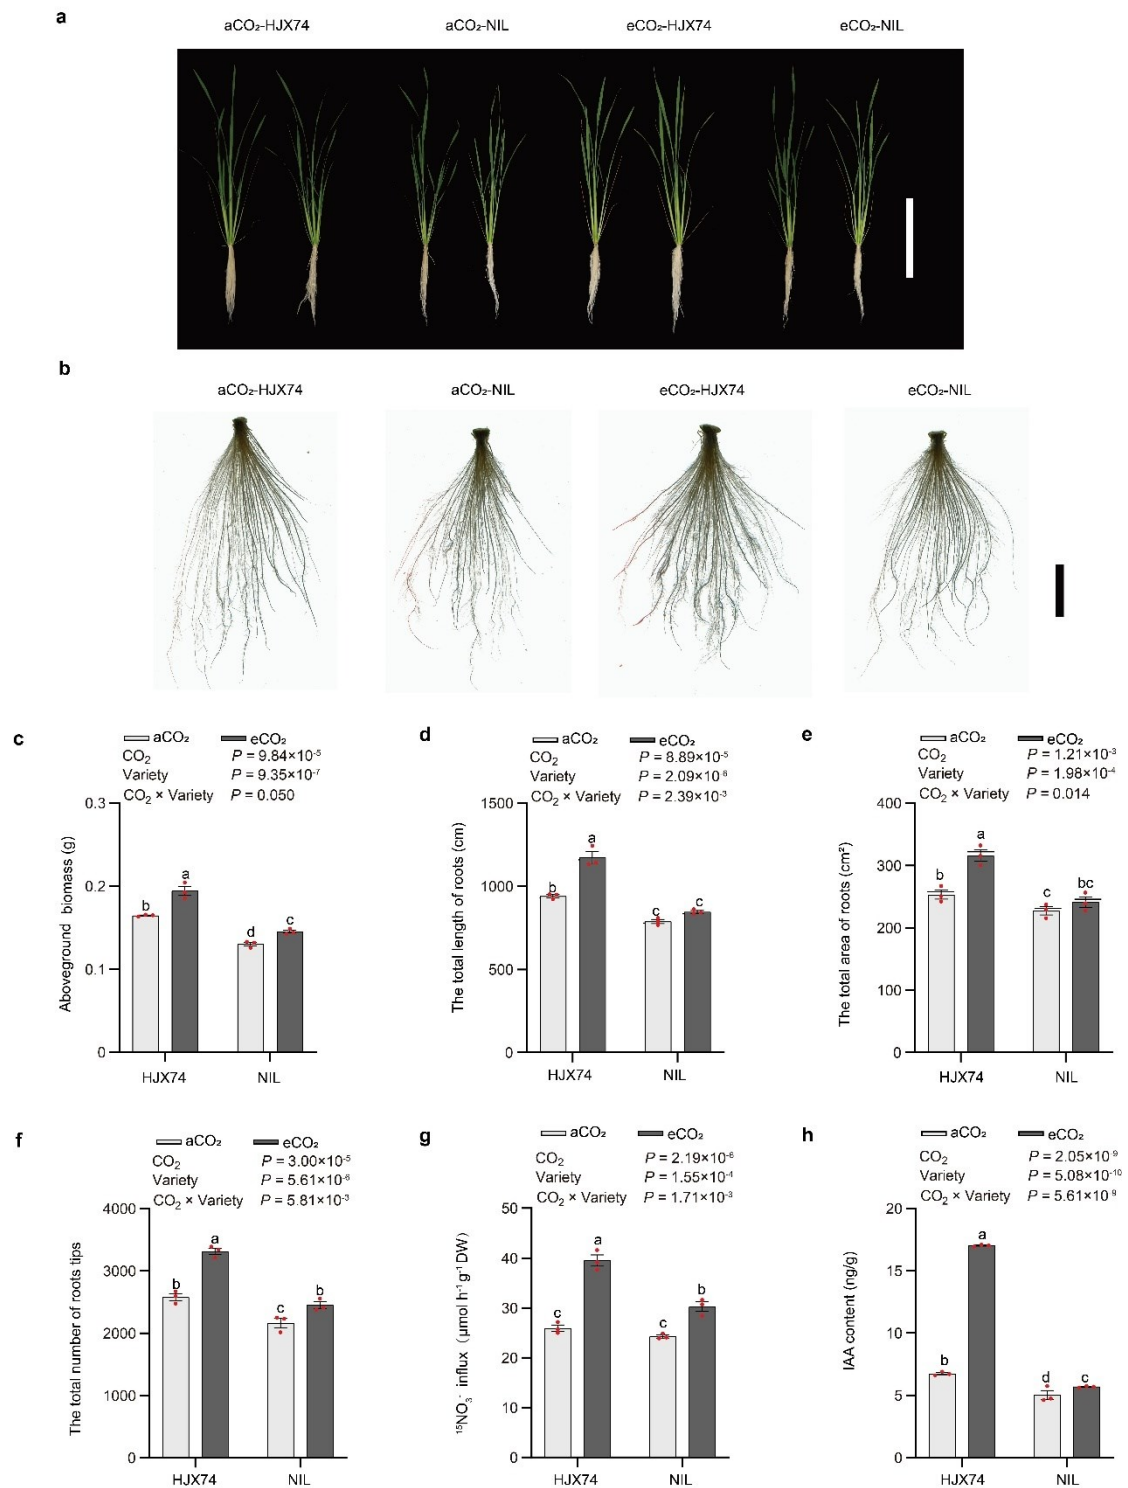

**Supplementary Fig. 11 | Differences in root development in response to elevated CO<sub>2</sub> between *indica* variety Hua-Jing-Xian 74 (HJX74) and the near-isogenic line (NIL) carrying the *japonica DNR1* allele. a, b, 14-day-old *indica* HJX74 and NIL rice plants grown under ambient CO<sub>2</sub> (aCO<sub>2</sub>) and elevated CO<sub>2</sub> (eCO<sub>2</sub>) conditions, respectively. Morphology of plants (a), root systems (b). a, Scale bar, 20 cm. b, Scale bar, 5 cm. c, Aboveground biomass. d-f, Root statistics of total length of visible roots (d), total area of visible roots (e), and number of root tips (f). g, h, <sup>15</sup>NO<sub>3</sub><sup>-</sup> uptake rates (g) and root free IAA content (h) of *indica* HJX74 and NIL under aCO<sub>2</sub> and eCO<sub>2</sub>**

conditions. **c-h**, Data are mean  $\pm$  s.e.m. ( $n = 3$  biological replicates).  $P$ -values were generated from two-way ANOVA. Different letters indicate significant differences among groups ( $P < 0.05$ ). Source data are provided as a Source Data file.

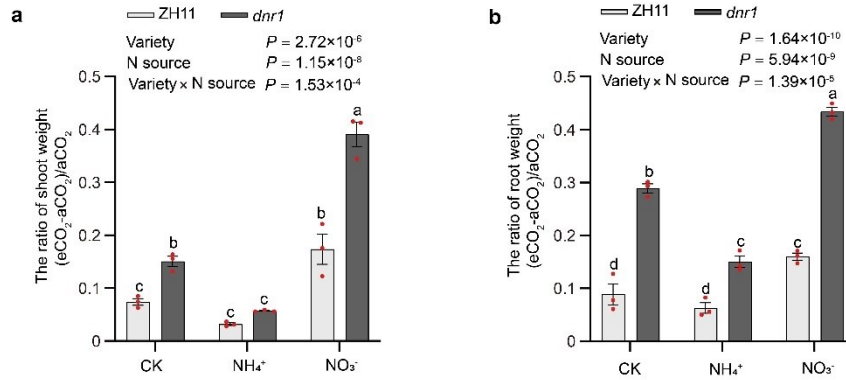

**Supplementary Fig. 12 | The response of Zhonghua 11 and *dnr1* plants to elevated CO<sub>2</sub> under different nitrogen source conditions. a-b**, 14-day-old *japonica* variety Zhonghua 11 (ZH11) and its *dnr1* mutants (*dnr1*) conducted hydroponic experiments using NH<sub>4</sub>NO<sub>3</sub> (CK), (NH<sub>4</sub>)<sub>2</sub>SO<sub>4</sub> (NH<sub>4</sub><sup>+</sup> N) or KNO<sub>3</sub> (NO<sub>3</sub><sup>-</sup> N) as the N source, respectively. The ratio of shoot weight (**a**), and the ratio of root weight (**b**). Data are mean  $\pm$  s.e.m. ( $n = 3$  biological replicates).  $P$ -values were generated from two-way ANOVA. Different letters indicate significant differences among groups ( $P < 0.05$ ). Source data are provided as a Source Data file.



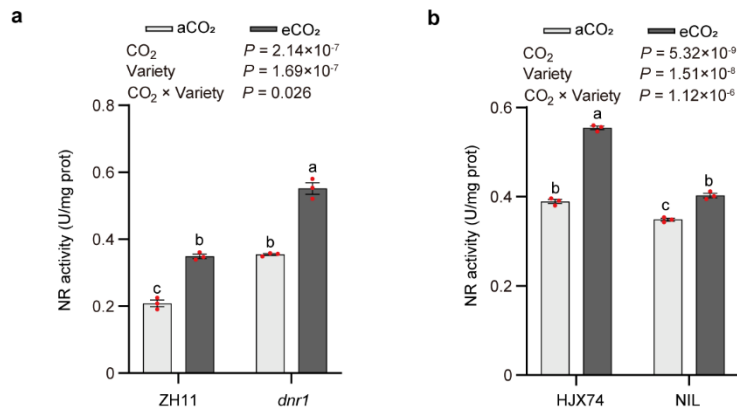

**Supplementary Fig. 13 | The responses of nitrate reductase activity to elevated CO<sub>2</sub>. a-b,** Nitrate reductase (NR) activities in *japonica* variety Zhonghua 11 (ZH11) and its *dnr1* mutants (*dnr1*) mimicking the *indica* *DNRI* allele (**a**), and *indica* variety Hua-Jing-Xian 74 (HJX74) and the near-isogenic line (NIL) carrying the *japonica* *DNRI* allele (**b**) grown under ambient CO<sub>2</sub> (aCO<sub>2</sub>) and elevated CO<sub>2</sub> (eCO<sub>2</sub>) conditions. Data are mean ± s.e.m. ( $n = 3$  biological replicates).  $P$ -values were determined by two-way ANOVA. Different letters indicate significant differences among groups ( $P < 0.05$ ). Source data are provided as a Source Data file.

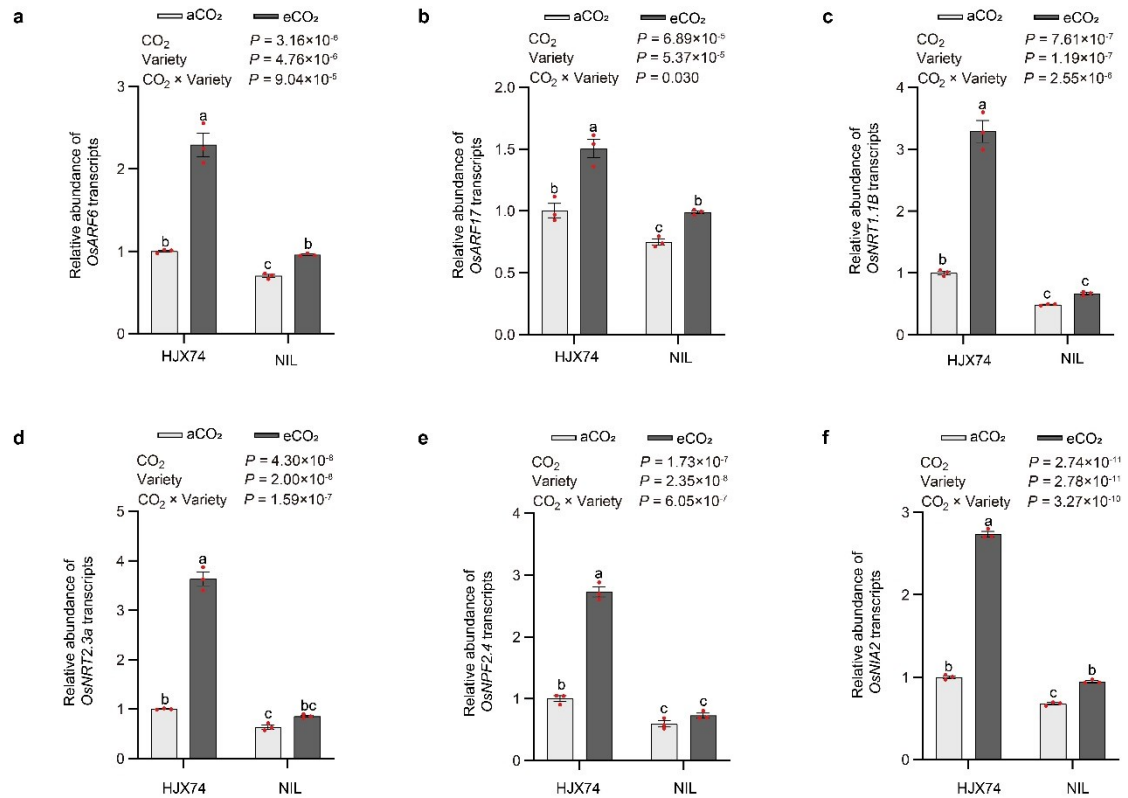

**Supplementary Fig. 14 | Elevated CO<sub>2</sub> enhances the expression levels of genes related to NO<sub>3</sub><sup>-</sup> metabolism in *indica* variety Hua-Jing-Xian 74 and the near-isogenic line carrying the *japonica DNRI* allele. a-b, Shoot mRNA abundances of *OsARF6* (a) and *OsARF17* (b) under ambient CO<sub>2</sub> (aCO<sub>2</sub>) and elevated CO<sub>2</sub> (eCO<sub>2</sub>) conditions relative to HJX74 under aCO<sub>2</sub> (set to 1). c-d, Root mRNA abundances of *OsNRT1.1B* (c) and *OsNRT2.3a* (d) under ambient CO<sub>2</sub> (aCO<sub>2</sub>) and elevated CO<sub>2</sub> (eCO<sub>2</sub>) conditions relative to HJX74 under aCO<sub>2</sub> (set to 1). e-f, Shoot mRNA abundances of *OsNPF2.4* (e) and *OsNIA2* (f) under ambient CO<sub>2</sub> (aCO<sub>2</sub>) and elevated CO<sub>2</sub> (eCO<sub>2</sub>) conditions relative to HJX74 under aCO<sub>2</sub> (set to 1). HJX74 and NIL indicate *indica* variety Hua-Jing-Xian 74 and the near-isogenic line carrying the *japonica DNRI* allele, respectively. a-f, Data are mean ± s.e.m. ( $n = 3$  biological replicates).  $P$ -values were determined by two-way ANOVA. Different letters indicate significant differences among groups ( $P < 0.05$ ). Source data are provided as a Source Data file.**

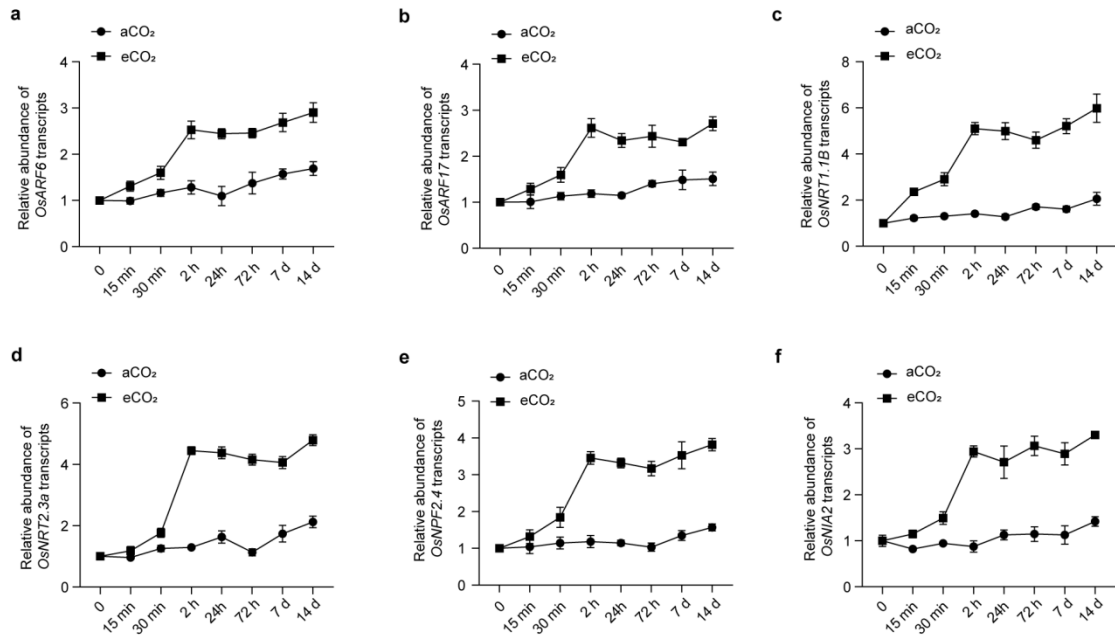

**Supplementary Fig. 15 | Elevated CO<sub>2</sub> enhances the expression levels of nitrogen-related genes through *OsARFs*.** **a-f**, The time course expression levels of *OsARF6* (**a**), *OsARF17* (**b**), *OsNRT1.1B* (**c**), *OsNRT2.3a* (**d**), *OsNPF2.4* (**e**), and *OsNIA2* (**f**) in Zhonghua 11 under ambient CO<sub>2</sub> (aCO<sub>2</sub>) and elevated CO<sub>2</sub> (eCO<sub>2</sub>) conditions relative to 0 (set to 1). Data are mean ± s.e.m. ( $n = 3$  biological replicates). Source data are provided as a Source Data file.

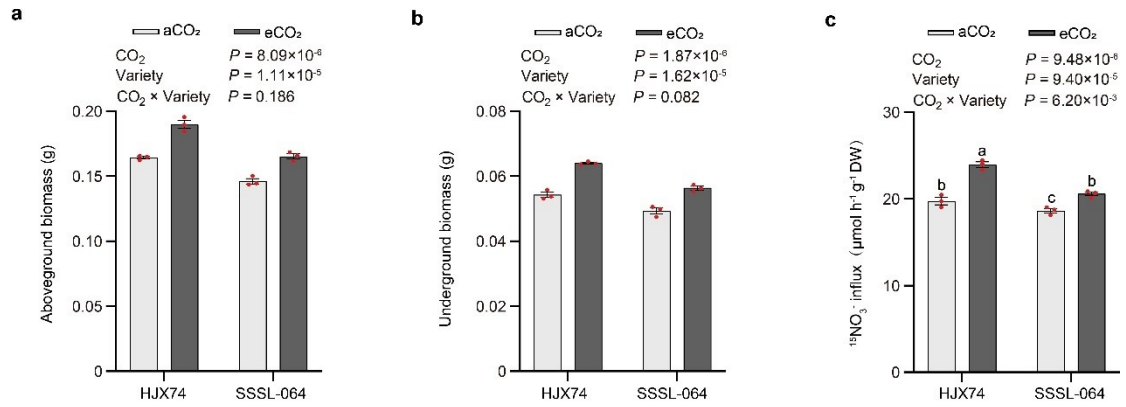

**Supplementary Fig. 16 | Differences in biomass and <sup>15</sup>NO<sub>3</sub><sup>-</sup> influx in responses to elevated CO<sub>2</sub> of Hua-Jing-Xian 74 and the near-isogenic line carrying the *japonica OsNRT1.1B* allele. a-c, 14-day-old *indica* Hua-Jing-Xian 74 (HJX74) and near-isogenic line (SSSL-064) rice plants grown under ambient CO<sub>2</sub> (aCO<sub>2</sub>) and elevated CO<sub>2</sub> (eCO<sub>2</sub>) conditions, respectively. Aboveground biomass (a), underground biomass (b), and <sup>15</sup>NO<sub>3</sub><sup>-</sup> influx (c). Data are mean ± s.e.m. ( $n = 3$  biological replicates).  $P$ -values were determined by two-way ANOVA. c, Different letters indicate significant differences among groups ( $P < 0.05$ ). Source data are provided as a Source Data file.**

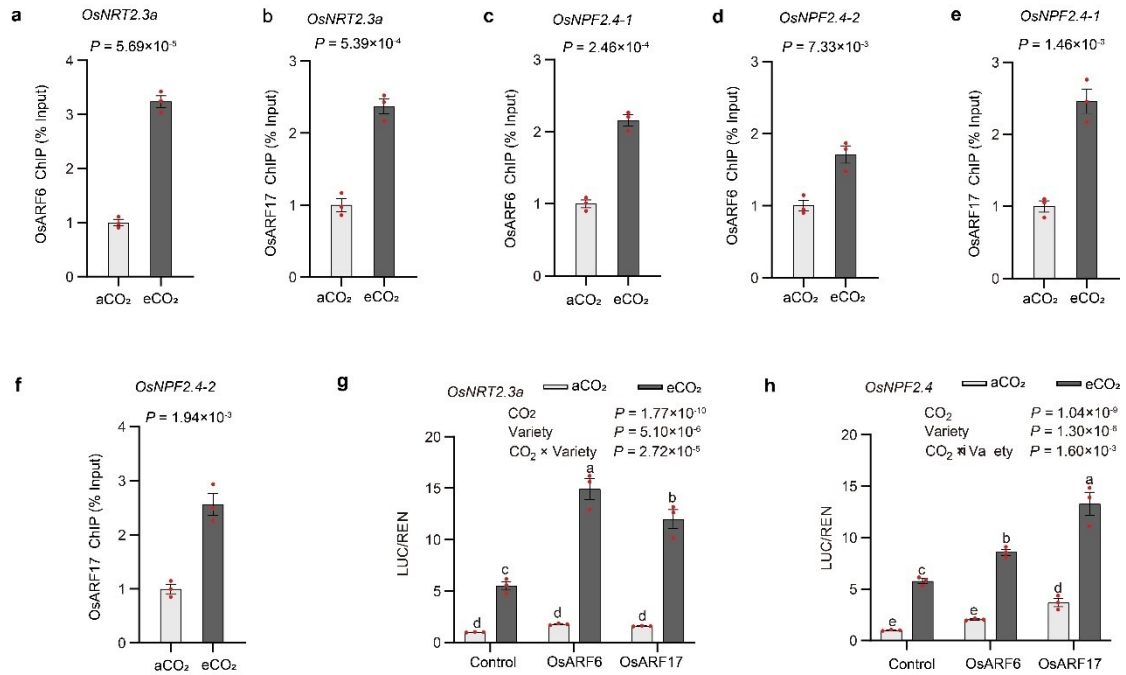

**Supplementary Fig. 17 | eCO<sub>2</sub> promotes OsARF6 and OsARF17-mediated CHIP-qPCR enrichment and transactivation on N metabolism-related genes.** **a-f**, Extent of OsARF6 and OsARF17-mediated CHIP-qPCR enrichment (relative to Input) of TGTCTC-containing promoter fragments from *OsNRT2.3a* (**a, b**) and *OsNPF2.4* (**c-f**) under ambient CO<sub>2</sub> (aCO<sub>2</sub>) and elevated CO<sub>2</sub> (eCO<sub>2</sub>) conditions. *P*-values were generated from two-sided Student's *t* tests. **g, h**, OsARF6 and OsARF17 activate promoter-luciferase fusion constructs *OsNRT2.3a* (**g**) and, *OsNPF2.4* (**h**) in transient transactivation assays. The luciferase (LUC)/renilla (REN) activity obtained from a co-transfection with an empty effector construct and indicated reporter constructs under ambient CO<sub>2</sub> was set to 1. *P*-values were generated from two-way ANOVA. Different letters indicate significant differences among groups (*P* < 0.05). **a-h**, Data are mean ± s.e.m. (*n* = 3 biological replicates). Source data are provided as a Source Data file.

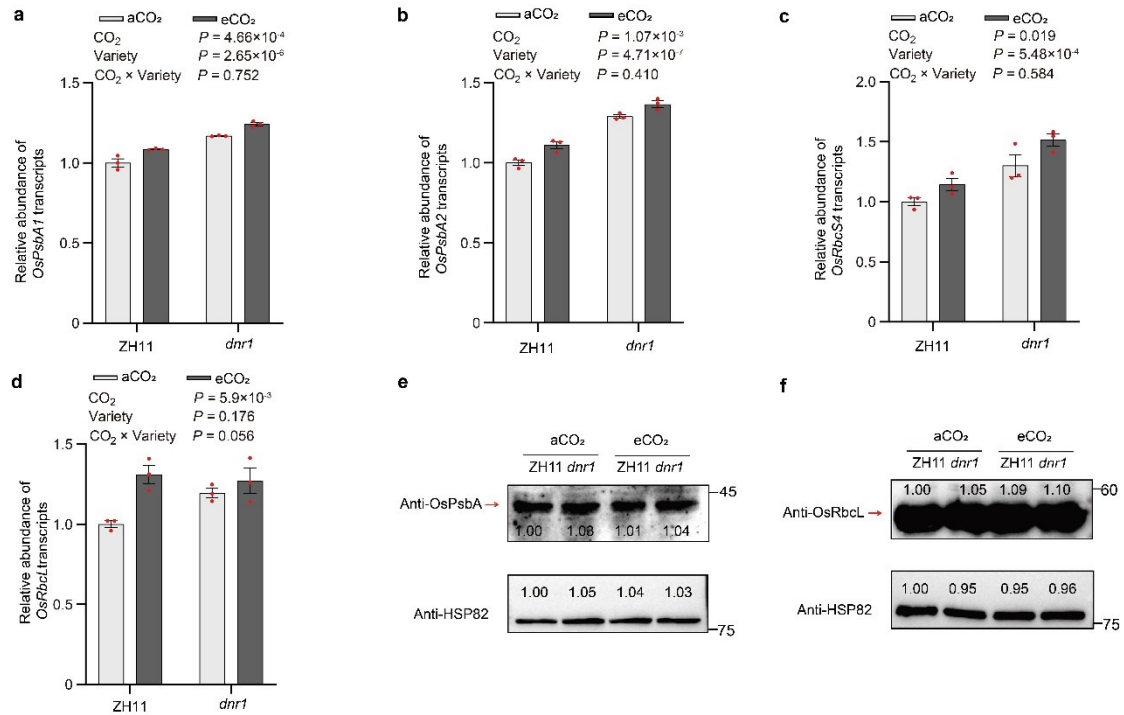

**Supplementary Fig. 18 | The expression of photosynthetic genes in *japonica* variety Zhonghua 11 and its *dnr1* mutants mimicking the *indica* *DNRI* allele under ambient CO<sub>2</sub> and elevated CO<sub>2</sub>. a-d**, Shoot mRNA abundances of *OsPsbA1* (a), *OsPsbA2* (b), *OsRbcS4* (c), and *OsRbcL* (d) grown ambient CO<sub>2</sub> (aCO<sub>2</sub>) and elevated CO<sub>2</sub> (eCO<sub>2</sub>) conditions, respectively, relative to Zhonghua 11 under aCO<sub>2</sub> (set to 1). *P*-values were generated from two-way ANOVA. Data are mean ± s.e.m. (*n* = 3 biological replicates). **e-f**, OsPsaA (e) and OsRbcL (f) protein abundances in shoots. HSP82 serves as a loading control. The red arrows indicate the OsPsaA, and OsRbcL bands, respectively. Data are representative of three independent experiments, with similar results. Source data are provided as a Source Data file.

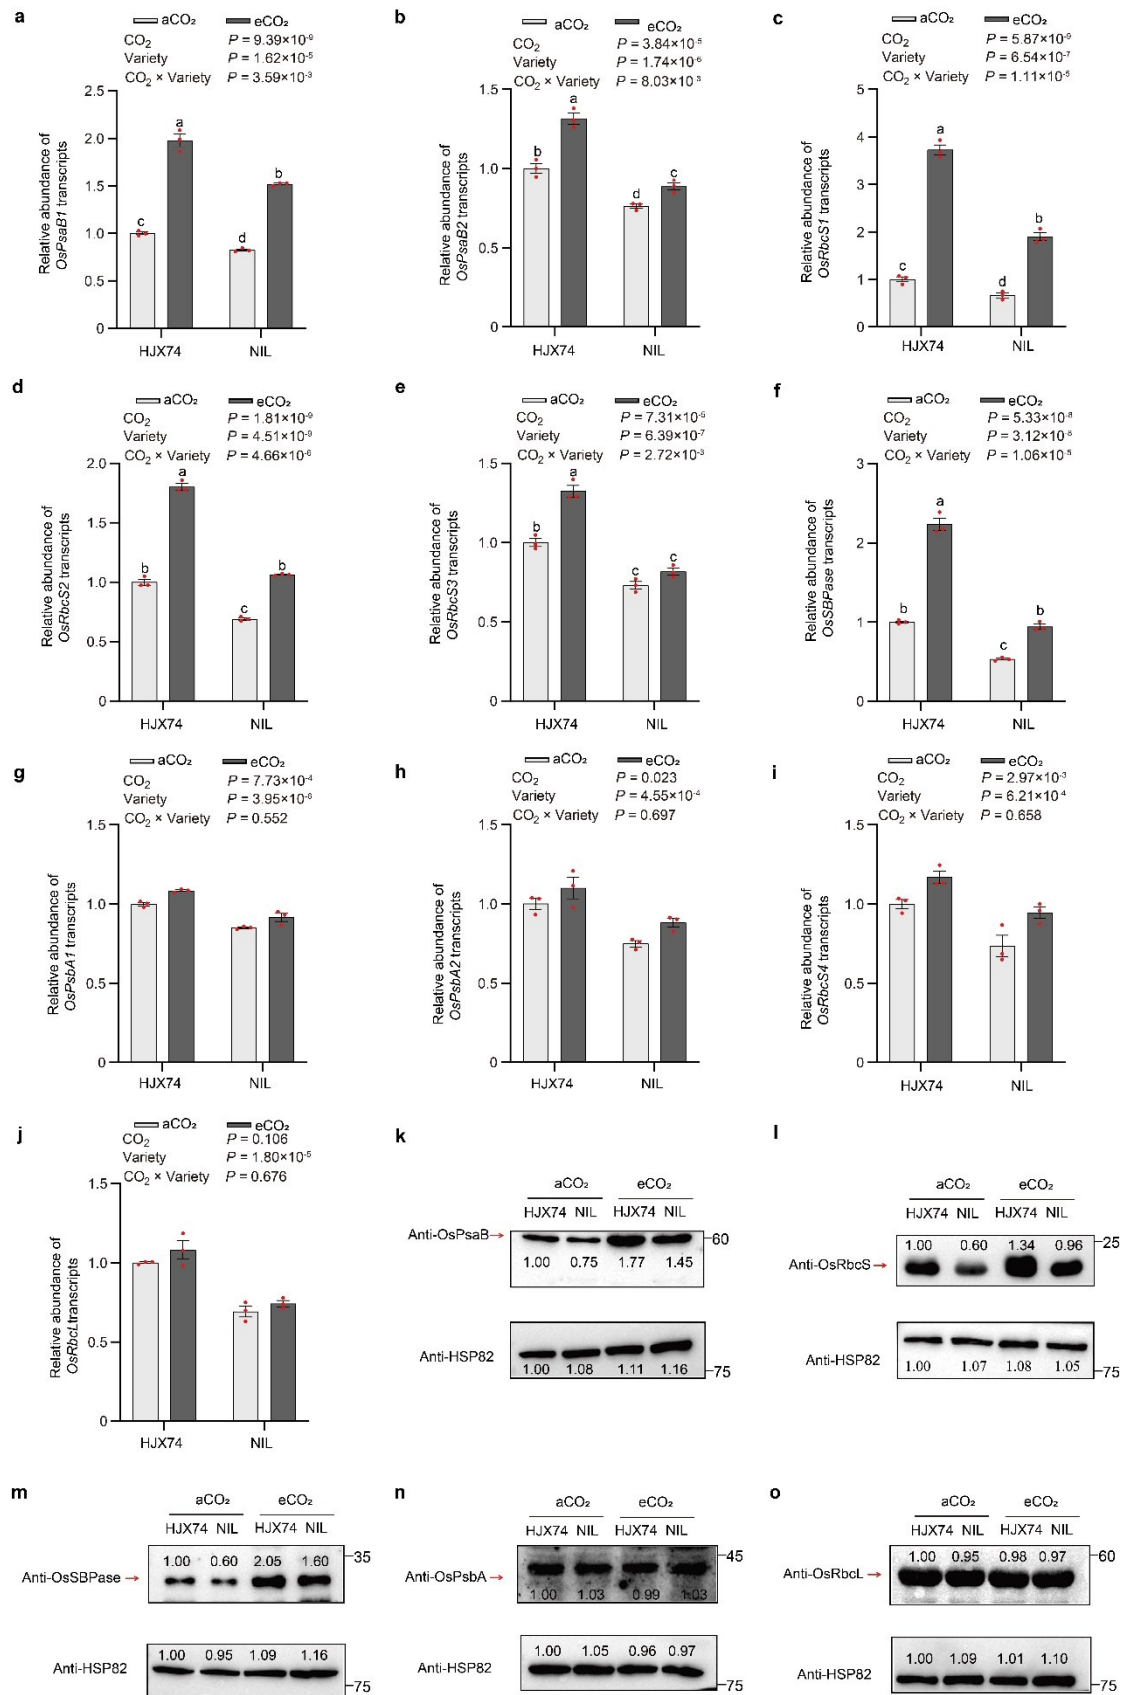

**Supplementary Fig. 19 | Elevated CO<sub>2</sub> affects the abundances of photosynthetic-related genes in *indica* variety Hua-Jing-Xian 74 and the near-isogenic line carrying the *japonica* DNR1**

**allele. a-j,** The expression levels of *OsPsaB1* (**a**), *OsPsaB2* (**b**), *OsRbcS1* (**c**), *OsRbcS2* (**d**), *OsRbcS3* (**e**), *OsSBPase* (**f**), *OsPsbA1* (**g**), *OsPsbA2* (**h**), *OsRbcS4* (**i**), *OsRbcL* (**j**) in plants grown under ambient CO<sub>2</sub> (aCO<sub>2</sub>) and elevated CO<sub>2</sub> (eCO<sub>2</sub>) conditions, relative to Hua-Jing-Xian 74 (HJX74) under aCO<sub>2</sub> (set to 1). Data are mean ± s.e.m. ( $n = 3$  biological replicates).  $P$ -values were generated from two-way ANOVA. **k-o,** *OsPsaB* (**k**), *OsRbcS* (**l**), *OsSBPase* (**m**), *OsPsbA* (**n**) and *OsRbcL* (**o**) protein abundances in leaves. HSP82 serves as a loading control. The red arrows indicate the *OsPsaB*, *OsRbcS*, *OsSBPase*, *OsPsbA*, and *OsRbcL* bands, respectively. Data are representative of three independent experiments, with similar results. **a-f,** Different letters indicate significant differences among groups ( $P < 0.05$ ). Source data are provided as a Source Data file.



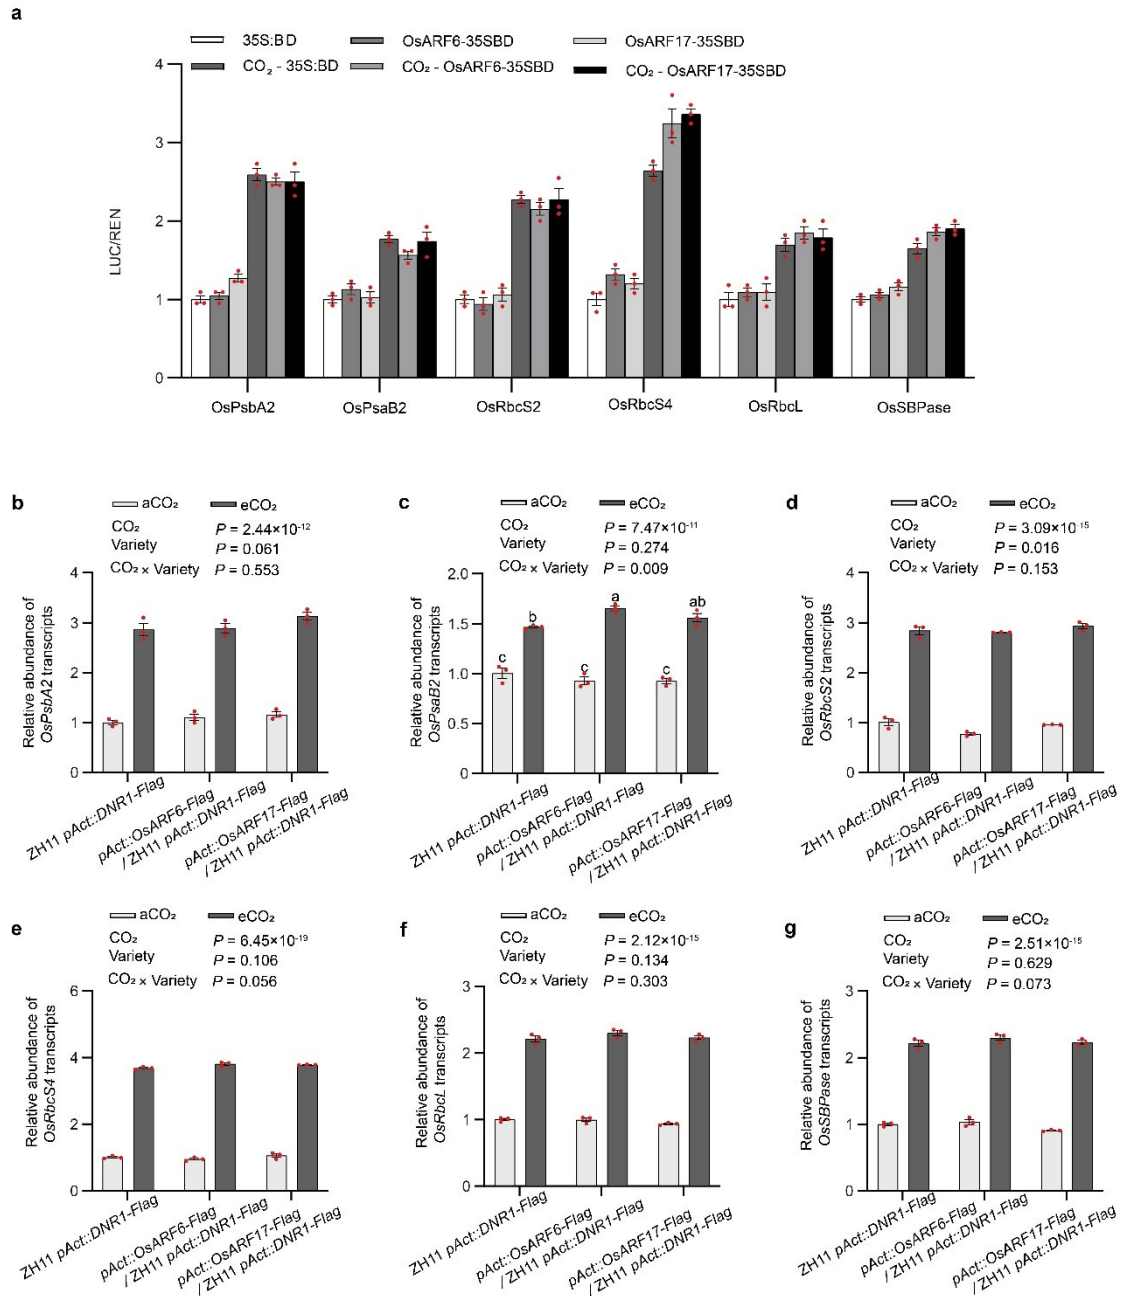

**Supplementary Fig. 20 | The effect of elevated CO<sub>2</sub> on the expression of photosynthetic genes may not be mediated by OsARFs.** (a) OsARF6 and OsARF17 do not activate promoter-luciferase fusion constructs *OsPsbA2*, *OsPsaB2*, *OsRbcS2*, *OsRbcS4*, *OsRbcL* and *OsSBPase* in transient transactivation assays. The luciferase (LUC)/renilla (REN) activity obtained from a co-transfection with an empty effector construct and indicated reporter constructs under ambient CO<sub>2</sub> (aCO<sub>2</sub>) was set to 1. **b-g**, Shoot mRNA abundances of *OsPsbA2* (b), *OsPsaB2* (c), *OsRbcS2* (d), *OsRbcS4* (e), *OsRbcL* (f), and *OsSBPase* (g) in plants overexpressing *OsARF6* and *OsARF17* within the ZH11/*pAct::DNR1-Flag* background with either aCO<sub>2</sub> or elevated CO<sub>2</sub> (eCO<sub>2</sub>) treatment, relative to ZH11 *pAct::DNR1-Flag* under aCO<sub>2</sub> (set to 1). **a-g**, Data are mean ± s.e.m. (*n* = 3 biological replicates). *P*-values were generated from two-way ANOVA. **c**, Different letters indicate significant differences among groups (*P* < 0.05). Source data are provided as a Source Data file.

## Supplementary Tables

**Supplementary Table 1 | The allelic variations of five genes involved in NO<sub>3</sub><sup>-</sup> use efficiency between *indica* and *japonica*.**

| Location         | <i>Indica</i> | <i>Japonica</i>                   |
|------------------|---------------|-----------------------------------|
| <i>OsNRT1.1B</i> | c.980 T       | c.980 C                           |
| <i>OsNR2</i>     | Arg783        | Trp779                            |
| <i>DNR1</i>      | -             | p -1728 ~ -1209, 520 bp insertion |
| <i>RNR10</i>     | -             | p -3645 ~ -150, 3496 bp insertion |
| <i>MYB61</i>     | -             | helitron element                  |

**Supplementary Table 2 | Detailed information on genes regulated by DNR1.**

| Gene name        | Gene ID        | Crop biological function(s)                                        |
|------------------|----------------|--------------------------------------------------------------------|
| <i>OsNRT1.1B</i> | LOC_Os10g40600 | dual-affinity nitrate transporter                                  |
| <i>OsNRT2.3a</i> | LOC_Os01g50820 | high-affinity nitrate transporter                                  |
| <i>OsNPF2.4</i>  | LOC_Os03g48180 | root to shoot nitrate transporter                                  |
| <i>OsNIA2</i>    | LOC_Os08g36500 | NADH-dependent nitrate reductase                                   |
| <i>OsARF6</i>    | LOC_Os02g06910 | auxin-responsive transcription factor promoting nitrate metabolism |
| <i>OsARF17</i>   | LOC_Os06g46410 | auxin-responsive transcription factor promoting nitrate metabolism |

**Supplementary Table 3 | Rice varieties in FACE experiments exhibiting *DNRI* allelic variations.**

| Varieties      | 520 bp | <i>indica/japonica</i> |
|----------------|--------|------------------------|
| No8            | +      | <i>japonica</i>        |
| Koshi          | +      | <i>japonica</i>        |
| Aikoku         | +      | <i>japonica</i>        |
| Akita          | +      | <i>japonica</i>        |
| Nipponbare     | +      | <i>japonica</i>        |
| Nanjing 9108   | +      | <i>japonica</i>        |
| Wuxiangjing 14 | +      | <i>japonica</i>        |
| Wuyunjing 21   | +      | <i>japonica</i>        |
| Wuyunjing 23   | +      | <i>japonica</i>        |
| YD6            | -      | <i>indica</i>          |
| IR24           | -      | <i>indica</i>          |
| Ilyou 084      | -      | <i>indica</i>          |
| Shanyou 63     | -      | <i>indica</i>          |
| Liangyoupei 9  | -      | <i>indica</i>          |
| Huajingxian 74 | -      | <i>indica</i>          |

**Supplementary Table 4 | Detailed information on photosynthetic genes.**

| Gene name       | Gene ID          | Crop biological function(s)                                         |
|-----------------|------------------|---------------------------------------------------------------------|
| <i>OsPsbA1</i>  | LOC_Os04g16770.1 | photosynthetic reaction center protein, putative, expressed         |
| <i>OsPsbA2</i>  | LOC_Os08g35420   | photosynthetic reaction center protein, putative, expressed         |
| <i>OsPsbA3</i>  | LOC_Os10g21192   | photosystem Q, putative, expressed                                  |
| <i>OsPsbA4</i>  | LOC_Os10g39880   | photosynthetic reaction center protein, putative, expressed         |
| <i>OsPsbA5</i>  | LOC_Os12g19580   | photosynthetic reaction center protein, putative, expressed         |
| <i>OsPsaB1</i>  | LOC_Os01g57962   | photosystem I P700 chlorophyll a apoprotein A2, putative, expressed |
| <i>OsPsaB2</i>  | LOC_Os01g57964   | photosystem I P700 chlorophyll a apoprotein A1, putative, expressed |
| <i>OsPsaB3</i>  | LOC_Os04g16760   | photosystem I P700 chlorophyll a apoprotein A1, putative            |
| <i>OsPsaB4</i>  | LOC_Os05g01675   | photosystem I P700 chlorophyll a apoprotein A1, putative            |
| <i>OsPsaB5</i>  | LOC_Os10g21248   | photosystem I P700 chlorophyll a apoprotein A2, putative            |
| <i>OsPsaB6</i>  | LOC_Os10g21250   | photosystem I P700 chlorophyll a apoprotein A1, putative            |
| <i>OsPsaB7</i>  | LOC_Os10g38229   | photosystem I P700 chlorophyll a apoprotein A1, putative            |
| <i>OsPsaB8</i>  | LOC_Os10g38234   | photosystem I P700 chlorophyll a apoprotein A2, putative            |
| <i>OsRbcS1</i>  | LOC_Os02g05830   | small subunit of Rubisco                                            |
| <i>OsRbcS2</i>  | LOC_Os12g17600   | small subunit of Rubisco                                            |
| <i>OsRbcS3</i>  | LOC_Os12g19381   | small subunit of Rubisco                                            |
| <i>OsRbcS4</i>  | LOC_Os12g19470   | small subunit of Rubisco                                            |
| <i>OsRbcL</i>   | LOC_Os10g21268   | ribulose biphosphate carboxylase large chain precursor              |
| <i>OsSBPase</i> | LOC_Os04g16680   | sedoheptulose 1,7-bisphosphatase                                    |

**Supplementary Table 5 | 13 transcription factors respond to both eCO<sub>2</sub> and DNR1.**

| Gene_id      | Gene_name    | Gene_description                                            | Annotation                   |
|--------------|--------------|-------------------------------------------------------------|------------------------------|
| Os01g0619900 | OsTCL2       | TCL2_ARATH MYB-like transcription factor TCL2               |                              |
| Os01g0603300 | Os01g0603300 | KUA1_ARATH Transcription factor KUA1                        |                              |
| Os06g0166400 | OsERF#007    | ERF08_ARATH Ethylene-responsive transcription factor ERF008 |                              |
| Os10g0562900 | DERF12       | EF102_ARATH Ethylene-responsive transcription factor 5      | Up-regulated by              |
| Os12g0116600 | OsWRKY95     | WRK46_ARATH Probable WRKY transcription factor 46           | both eCO <sub>2</sub> and    |
| Os12g0618600 | OsHAP2F      | NFYA6_ARATH Nuclear transcription factor Y subunit A-6      | null- <i>DNR1</i> allele     |
| Os11g0117600 | OsWRKY50     | RK19_ORYSJ Transcription factor WRKY19                      |                              |
| Os07g0158500 | OsHAP2J      | NFYAA_ARATH Nuclear transcription factor Y subunit A-10     |                              |
| Os03g0366800 | OsHsfB4d     | HFB4D_ORYSJ Heat stress transcription factor B-4d           |                              |
| Os04g0541100 | GT-2         | DF1_ARATH Trihelix transcription factor DF1                 | Down-regulated               |
| Os04g0381700 | OsBHLH156    | BH156_ORYSJ Transcription factor BHLH156                    | by both eCO <sub>2</sub> and |
| Os04g0686200 | Os04g0686200 | PRAF1_ARATH PH, RCC1 and FYVE domains-containing protein 1  | null- <i>DNR1</i> allele     |
| Os08g0483900 | OsBHLH047    | BH094_ARATH Transcription factor bHLH94                     |                              |

**Supplementary Table 6 | Effects of elevated CO<sub>2</sub> and varieties on rice yield composition.**

| Treatment       |                          | Panicles per ha<br>(10 <sup>4</sup> ) | Spikelets per panicle | Grain filling rate (%) | 1000-grain weight (g) |
|-----------------|--------------------------|---------------------------------------|-----------------------|------------------------|-----------------------|
| ZH11            | aCO <sub>2</sub>         | 215.1±6.4                             | 137.3±3.0             | 82.1±0.6               | 28.6±0.2              |
|                 | eCO <sub>2</sub>         | 220.4±6.4                             | 141.7±0.9             | 82.7±1.0               | 27.9±0.1              |
| <i>dnr1</i>     | aCO <sub>2</sub>         | 227.6±1.8                             | 150.0±0.6             | 80.4±1.4               | 26.3±0.2              |
|                 | eCO <sub>2</sub>         | 248.9±4.7                             | 158.8±2.3             | 87.8±0.2               | 25.6±0.1              |
|                 | CO <sub>2</sub>          | 0.033                                 | 0.010                 | 0.003                  | 0.001                 |
| <i>P</i> -value | Variety                  | 0.004                                 | 6.5×10 <sup>-5</sup>  | 0.108                  | 2.3×10 <sup>-7</sup>  |
|                 | CO <sub>2</sub> ×Variety | 0.161                                 | 0.296                 | 0.006                  | 0.770                 |
| HJX74           | aCO <sub>2</sub>         | 245.3±5.3                             | 170.0±5.7             | 86.7±0.6               | 24.6±0.2              |
|                 | eCO <sub>2</sub>         | 284.4±7.7                             | 182.6±4.4             | 93.3±0.1               | 23.9±0.2              |
| NIL             | aCO <sub>2</sub>         | 216.9±8.9                             | 164.2±3.3             | 82.5±0.9               | 29.0±0.1              |
|                 | eCO <sub>2</sub>         | 231.1±6.4                             | 165.7±2.9             | 83.1±1.3               | 29.3±0.3              |
|                 | CO <sub>2</sub>          | 0.006                                 | 0.136                 | 0.003                  | 0.423                 |
| <i>P</i> -value | Variety                  | 4.7×10 <sup>-4</sup>                  | 0.028                 | 3.2×10 <sup>-5</sup>   | 2.0×10 <sup>-8</sup>  |
|                 | CO <sub>2</sub> ×Variety | 0.123                                 | 0.226                 | 0.008                  | 0.056                 |

ZH11 and *dnr1* indicate *japonica* variety Zhonghua 11 and its *dnr1* mutants mimicking the *indica* *DNR1* allele, respectively. HJX74 and NIL indicate *indica* variety Hua-Jing-Xian 74 and the near-isogenic line carrying the *japonica* *DNR1* allele, respectively. aCO<sub>2</sub> and eCO<sub>2</sub> indicate ambient CO<sub>2</sub> and elevated CO<sub>2</sub> condition, respectively. Data are mean ± s.e.m. (*n* = 3 biological replicates). *P*-values were generated from two-way ANOVA. Source data are provided as a Source Data file.

**Supplementary Table 7 | Primer sequences used for qPCR assays used in this study.**

| Primers          | Forward sequence (5'-3') | Reverse sequence (5'-3') | Annotation                     |
|------------------|--------------------------|--------------------------|--------------------------------|
| OsActin2         | AGCAGCATGAAGATCAAGGTGGTC | CCTTGGCAATCCACATCTGCTG   |                                |
| DNR1             | TGCAAACAAGCATGGTGTGG     | TCACAAGTTCTTGCAAGCCG     |                                |
| OsNRT1.1B        | GGCAGGCTCGACTACTTCTA     | AGGCGCTTCTCCTTGTAGAC     |                                |
| OsNRT2.3a        | CTCATCCGCGACACCCCTC      | GATGGAGGAGCAGTACACCG     |                                |
| OsNPF2.4         | TAGGATTAAGTGGGTGAGG      | GTCAAACAGCAAGTAGCG       |                                |
| OsNIA2           | GTTACGAACCAAGGGGGAT      | AATCTCCACGGGCCACCATA     |                                |
| OsARF6           | CCACATCCAACCTCCTTAGC     | ACAGAGACGTACAGAACTGG     |                                |
| OsARF17          | GGATCAAGATGGGAACTCTG     | TAGTCATCACAGCTGCTACC     |                                |
| OsPsbA-Primer 1  | TGCAGCTGCTACTGCTGTTT     | CACTAAATAGGGAACCGCCG     | For <i>OsPsbA1-3</i>           |
| OsPsbA--Primer 2 | TTTGGGAAGCTGCATCTGTT     | AGAAAACAGCAGTAGCAGCT     | For <i>OsPsbA1-5</i>           |
| OsPsaB--Primer 1 | CCACTCAAGGAGCGGAACTG     | GAGCAATATCGGTCAGCCACAAAC | For <i>OsPsaB1, 5, 8</i>       |
| OsPsaB--Primer 2 | TATTTGCTCGCAGTTCCCGT     | TACCCCAAACATCCGACTGC     | For <i>OsPsaB2, 3, 4, 6, 7</i> |
| OsRbcS1          | ATGCCATTGCCATCCCAAGT     | ATGTCGCCGGAGTAGAGAGT     |                                |
| OsRbcS2          | CCCTCTCCTACCTGCCACCG     | GACGAATGCATCAGGGTACG     |                                |
| OsRbcS3          | GCATCATCGGCTTCGACAAC     | TTAGTTTCCGCCGACTCCT      |                                |
| OsRbcS4          | CTCTGTCTACTTGCCGCCAT     | AACGAAGGCATCAGGGTATG     |                                |
| OsRbcL           | AAACTTTCCAAGGTCCGCCT     | ACAAAACGGTCCCTCCAACG     |                                |
| OsSBPase         | AAACAGTCGGTGCTGGACAA     | GAGTCTCCTCGAACCGGATG     |                                |
| ChIP-OsNRT1.1B   | CGGTGGCTTCATCACAGCAT     | TTGTAGTCCCACGCTCCGT      |                                |
| ChIP-OsNRT2.3a   | CGGCCAGCTCAAGGAACTT      | CCATGGCTTCTCATGCTCTG     |                                |
| ChIP-OsNPF2.4-1  | CTGACGACTAGTACGAATCG     | TCTCACCAACCACCACCTCT     |                                |
| ChIP-OsNPF2.4-2  | CGCATCCGCATCCGTACATT     | CTCTCCCTTCACTGCGTC       |                                |
| ChIP-OsNIA2      | ATGTGTGCATGTTGTGTACG     | TTCAGCTCAGCTACAGCTCG     |                                |



**Supplementary Table 8 | Primer sequences used for luciferase activity assays.**

| Primers               | Sequence (5'-3')                            |
|-----------------------|---------------------------------------------|
| OsARF6-sem-BamHI-F    | TCGCCGTCTAGAACTAGTGAATGAAGCTCTCGCCGTCGGCC   |
| OsARF6-sem-EcoRI-R    | GTATCGATAAGCTTGATATCGTTTCAGAACTCAACTGAGCCCA |
| OsARF17-sem-BamHI-F   | TCGCCGTCTAGAACTAGTGAATGAGGCTTTCGTCGTCGTC    |
| OsARF17-sem-EcoRI-R   | GTATCGATAAGCTTGATATCGTTTCAGAATCAACTGAGCCGA  |
| OsNRT1.1B-sem-EcoRV-F | TGGATTGATGTGATATCAAGGGCATCGTCTGAGTCTG       |
| OsNRT1.1B-sem-XbaII-R | CTTGACAGATCCTCTAGAATCAACAACAACAAGCTCGA      |
| OsNRT2.3a-sem-EcoRV-F | TGGATTGATGTGATATCTGTTGCCAGGAATTGCTTG        |
| OsNRT2.3a-sem-XbaII-R | CTTGACAGATCCTCTAGACTCCAACACGTGGTAGCAAG      |
| OsNPF2.4-sem-EcoRV-F  | TGGATTGATGTGATATCTGGAAGGAGGGTTTTGGCCAG      |
| OsNPF2.4-sem-XbaII-R  | CTTGACAGATCCTCTAGACCTCTCTACCAACCACCACCT     |
| OsNIA2-sem-EcoRV-F    | TGGATTGATGTGATATCGAATCCCACAATTATTTTC        |
| OsNIA2-sem-XbaII-R    | CTTGACAGATCCTCTAGAGCTTGGTGTTCGGTTCTGCGT     |
| OsPsbA2-sem-EcoRV-F   | TGGATTGATGTGATATCGGGAGGAAGGTCTCGGACAA       |
| OsPsbA2-sem-XbaII-R   | CTTGACAGATCCTCTAGACTTTCTCCGAGTCCCAATA       |
| OsPsaB2-sem-EcoRV-F   | TGGATTGATGTGATATCAATGACGGTAGCTTGCGAAT       |
| OsPsaB2-sem-XbaII-R   | CTTGACAGATCCTCTAGATAAGTCTCTCTTTCCGGA        |
| OsRbcS2-sem-EcoRV-F   | TGGATTGATGTGATATCGTATTGCTGATGCCCTTATT       |
| OsRbcS2-sem-XbaII-R   | CTTGACAGATCCTCTAGACTCTGCAGCTCACCAAGCTC      |
| OsRbcS4-sem-EcoRV-F   | TGGATTGATGTGATATCTGTCACTGGCAGTCTATGA        |
| OsRbcS4-sem-XbaII-R   | CTTGACAGATCCTCTAGATGCTAGCTTGCTAGGAGCTA      |
| OsRbcL-sem-EcoRV-F    | TGGATTGATGTGATATCCCCAAATAATTCGCTTAGGA       |
| OsRbcL-sem-XbaII-R    | CTTGACAGATCCTCTAGAACAGGGTCTACTCGATATGG      |
| OsSBPase-sem-EcoRV-F  | TGGATTGATGTGATATCTCATGAGCCTGCACAGATAG       |
| OsSBPase-sem-XbaII-R  | CTTGACAGATCCTCTAGACCGCCTAGCTAGTTAGTTA       |
