# Supplementary material for: Variation in a single allele drives divergent yield responses to elevated CO2 between rice subspecies
Source: PubMed Central journal article supplement — Nat Commun. 2025 Jan 3;16:376. doi: 10.1038/s41467-024-55809-3 (PMC11698830; doi:10.1038/s41467-024-55809-3), 2025-01-03
Supplement: 41467_2024_55809_MOESM2_ESM.pdf [file 41467_2024_55809_MOESM2_ESM.pdf]

## Reporting Summary

Nature Portfolio wishes to improve the reproducibility of the work that we publish. This form provides structure for consistency and transparency in reporting. For further information on Nature Portfolio policies, see our [Editorial Policies](#) and the [Editorial Policy Checklist](#).

### Statistics

For all statistical analyses, confirm that the following items are present in the figure legend, table legend, main text, or Methods section.

n/a Confirmed

- The exact sample size ( $n$ ) for each experimental group/condition, given as a discrete number and unit of measurement
- A statement on whether measurements were taken from distinct samples or whether the same sample was measured repeatedly
- The statistical test(s) used AND whether they are one- or two-sided  
*Only common tests should be described solely by name; describe more complex techniques in the Methods section.*
- A description of all covariates tested
- A description of any assumptions or corrections, such as tests of normality and adjustment for multiple comparisons
- A full description of the statistical parameters including central tendency (e.g. means) or other basic estimates (e.g. regression coefficient) AND variation (e.g. standard deviation) or associated estimates of uncertainty (e.g. confidence intervals)
- For null hypothesis testing, the test statistic (e.g.  $F$ ,  $t$ ,  $r$ ) with confidence intervals, effect sizes, degrees of freedom and  $P$  value noted  
*Give  $P$  values as exact values whenever suitable.*
- For Bayesian analysis, information on the choice of priors and Markov chain Monte Carlo settings
- For hierarchical and complex designs, identification of the appropriate level for tests and full reporting of outcomes
- Estimates of effect sizes (e.g. Cohen's  $d$ , Pearson's  $r$ ), indicating how they were calculated

*Our web collection on [statistics for biologists](#) contains articles on many of the points above.*

### Software and code

Policy information about [availability of computer code](#)

#### Data collection

For RNA-seq: Illumina Novaseq platform.  
 For root system analysis: ScanMarker i800plus and RhizoPheno root analysis system (Zhejiang Top Cloud-agri Technology Company).  
 For measure 15N fluxes: Isoprime 100 (Elementar, Germany).  
 For measure IAA content: ESI-HPLC-MS/MS system.  
 For LUC activity determination: Dual-LUC Reporter Assay System (Promega, Madison, WI, USA; E1960).  
 For plant growth phenotype images: Canon EOS80D(W) Camera.  
 For RT-qPCR: ABI QuantStudio6 FLEX Q6 Touch Real-Time PCR Detection System.  
 For Western blotting: Tanon 5200 Chemiluminescent Imaging System.  
 For immunoblotting visualization Tanon image GIS Semi-quantitative analysis.  
 For Enzyme activity assay: Spectra Max iD5.  
 For measure N content: Elemental analyzer (vario PYRO, Elementar, Germany).  
 For gas exchange measurement: Li-6800 (Li-COR, Lincoln, America).  
 For chlorophyll fluorescence measurement: FluorPen FP110-LM/D (Photon Systems Instrument, Czech).  
 For leaf area measurement: Li-3000C (Li-COR, Lincoln, America).

#### Data analysis

For plotting and statistical analysis of biological data: Microsoft Excel 2019, SAS 9.2, SPSS 27 and GraphPad Prism 8.0.2.  
 For qPCR analysis: ABI QuantStudio6 FLEX Q6 Manager was used.  
 For RNA-seq analysis: Novogene.

For manuscripts utilizing custom algorithms or software that are central to the research but not yet described in published literature, software must be made available to editors and reviewers. We strongly encourage code deposition in a community repository (e.g. GitHub). See the Nature Portfolio [guidelines for submitting code & software](#) for further information.

## Data

Policy information about [availability of data](#)

All manuscripts must include a [data availability statement](#). This statement should provide the following information, where applicable:

- Accession codes, unique identifiers, or web links for publicly available datasets
- A description of any restrictions on data availability
- For clinical datasets or third party data, please ensure that the statement adheres to our [policy](#)

We have provided a full data availability statement in the manuscript: Raw RNA-seq data were deposited at the National Genomics Data Center, Genome Sequence Archive (GSA) (accession number PRJCA024327 [<https://ngdc.cncb.ac.cn/gsa/s/Hz4L1U30>]).

## Research involving human participants, their data, or biological material

Policy information about studies with [human participants or human data](#). See also policy information about [sex, gender \(identity/presentation\), and sexual orientation](#) and [race, ethnicity and racism](#).

|                                                                    |     |
|--------------------------------------------------------------------|-----|
| Reporting on sex and gender                                        | N/A |
| Reporting on race, ethnicity, or other socially relevant groupings | N/A |
| Population characteristics                                         | N/A |
| Recruitment                                                        | N/A |
| Ethics oversight                                                   | N/A |

Note that full information on the approval of the study protocol must also be provided in the manuscript.

## Field-specific reporting

Please select the one below that is the best fit for your research. If you are not sure, read the appropriate sections before making your selection.

Life sciences       Behavioural & social sciences       Ecological, evolutionary & environmental sciences

For a reference copy of the document with all sections, see [nature.com/documents/nr-reporting-summary-flat.pdf](https://www.nature.com/documents/nr-reporting-summary-flat.pdf)

## Life sciences study design

All studies must disclose on these points even when the disclosure is negative.

|                 |                                                                                                                                                                                                                                                                                                                                      |
|-----------------|--------------------------------------------------------------------------------------------------------------------------------------------------------------------------------------------------------------------------------------------------------------------------------------------------------------------------------------|
| Sample size     | For the rice fields trials and hydroponic experiment, more than 3 samples for each genotype were randomly selected and used for quantification.<br>For RT-qPCR, 3 biological repeats were sampled.<br>The sample sizes and material amount were determined based on experimental trials to allow for confident statistical analyses. |
| Data exclusions | No data were excluded from our analyses.                                                                                                                                                                                                                                                                                             |
| Replication     | All experiments were repeated at least three times, and similar results were obtained.                                                                                                                                                                                                                                               |
| Randomization   | Plants of equal initial size were randomly assigned to the treatment and control groups.                                                                                                                                                                                                                                             |
| Blinding        | Analysis were performed in a manner blinded to treatment assignment in all experiments.                                                                                                                                                                                                                                              |

## Behavioural & social sciences study design

All studies must disclose on these points even when the disclosure is negative.

|                   |  |
|-------------------|--|
| Study description |  |
| Research sample   |  |
| Sampling strategy |  |

|                   |                      |
|-------------------|----------------------|
| Data collection   | <input type="text"/> |
| Timing            | <input type="text"/> |
| Data exclusions   | <input type="text"/> |
| Non-participation | <input type="text"/> |
| Randomization     | <input type="text"/> |

## Ecological, evolutionary & environmental sciences study design

All studies must disclose on these points even when the disclosure is negative.

|                          |                      |
|--------------------------|----------------------|
| Study description        | <input type="text"/> |
| Research sample          | <input type="text"/> |
| Sampling strategy        | <input type="text"/> |
| Data collection          | <input type="text"/> |
| Timing and spatial scale | <input type="text"/> |
| Data exclusions          | <input type="text"/> |
| Reproducibility          | <input type="text"/> |
| Randomization            | <input type="text"/> |
| Blinding                 | <input type="text"/> |

Did the study involve field work?  Yes  No

## Field work, collection and transport

|                        |                      |
|------------------------|----------------------|
| Field conditions       | <input type="text"/> |
| Location               | <input type="text"/> |
| Access & import/export | <input type="text"/> |
| Disturbance            | <input type="text"/> |

## Reporting for specific materials, systems and methods

We require information from authors about some types of materials, experimental systems and methods used in many studies. Here, indicate whether each material, system or method listed is relevant to your study. If you are not sure if a list item applies to your research, read the appropriate section before selecting a response.

### Materials & experimental systems

| n/a                                 | Involved in the study                                  |
|-------------------------------------|--------------------------------------------------------|
| <input type="checkbox"/>            | <input checked="" type="checkbox"/> Antibodies         |
| <input checked="" type="checkbox"/> | <input type="checkbox"/> Eukaryotic cell lines         |
| <input checked="" type="checkbox"/> | <input type="checkbox"/> Palaeontology and archaeology |
| <input checked="" type="checkbox"/> | <input type="checkbox"/> Animals and other organisms   |
| <input checked="" type="checkbox"/> | <input type="checkbox"/> Clinical data                 |
| <input checked="" type="checkbox"/> | <input type="checkbox"/> Dual use research of concern  |
| <input type="checkbox"/>            | <input checked="" type="checkbox"/> Plants             |

### Methods

| n/a                                 | Involved in the study                           |
|-------------------------------------|-------------------------------------------------|
| <input checked="" type="checkbox"/> | <input type="checkbox"/> ChIP-seq               |
| <input checked="" type="checkbox"/> | <input type="checkbox"/> Flow cytometry         |
| <input checked="" type="checkbox"/> | <input type="checkbox"/> MRI-based neuroimaging |

## Antibodies

|                 |                                                                                                                                                                                                                                                                                                                                                                                                                                                                                                                                                                                                                                                                                                                                                                                                                                                                                                                                                               |
|-----------------|---------------------------------------------------------------------------------------------------------------------------------------------------------------------------------------------------------------------------------------------------------------------------------------------------------------------------------------------------------------------------------------------------------------------------------------------------------------------------------------------------------------------------------------------------------------------------------------------------------------------------------------------------------------------------------------------------------------------------------------------------------------------------------------------------------------------------------------------------------------------------------------------------------------------------------------------------------------|
| Antibodies used | The information of the antibodies used in this study were showed below:<br>anti-HSP82, AbM51099-31-PU, Lot No. 2020032401. 1:5000 dilution;<br>anti-Rabbite IgG: Peroxidase-AffiniPure IgG (H+L), jackson (111-035-003). Dilution: 1:10000;<br>anti-Mouse IgG: Peroxidase-AffiniPure IgG (H+L), jackson (115-035-003). Dilution: 1:10000;<br>anti-DNR1 were generated by ABclonal, E12199. 1:5000 dilution;<br>anti-PsbA, Agrisera, AS05084. Dilution: 1:5000;<br>anti-PsaB Agrisera, AS10695. Dilution: 1:5000;<br>anti-RbcS Agrisera, AS07259. Dilution: 1:5000;<br>anti-Rbcl Agrisera, AS03037. Dilution: 1:5000;<br>anti-SBPase Agrisera, AS152873. Dilution: 1:5000.                                                                                                                                                                                                                                                                                     |
| Validation      | Anti-HSP82 antibody verification can be found on the manufacturers website ( <a href="http://www.proteomics.org.cn/product/202.html">http://www.proteomics.org.cn/product/202.html</a> );<br>Anti-Rabbite IgG antibody verification can be found on the manufacturers website ( <a href="https://www.jacksonimmuno.com/catalog/products/111-035-003">https://www.jacksonimmuno.com/catalog/products/111-035-003</a> );<br>Anti-Mouse IgG antibody verification can be found on the manufacturers website ( <a href="https://www.jacksonimmuno.com/catalog/products//115-035-003">https://www.jacksonimmuno.com/catalog/products//115-035-003</a> );<br>Anti-PsbA, Anti-PsaB, Anti-RbcS, Anti-Rbcl and anti-SBPase antibody verifications can be found on the manufacturers website ( <a href="https://www.agrisera.com/">https://www.agrisera.com/</a> );<br>Anti-DNR1 antibody was previously validated in Zhang et al., 2021 (doi: 10.1093/plcell/koaa037). |

## Eukaryotic cell lines

Policy information about [cell lines and Sex and Gender in Research](#)

|                                                                      |                      |
|----------------------------------------------------------------------|----------------------|
| Cell line source(s)                                                  | <input type="text"/> |
| Authentication                                                       | <input type="text"/> |
| Mycoplasma contamination                                             | <input type="text"/> |
| Commonly misidentified lines<br>(See <a href="#">ICLAC</a> register) | <input type="text"/> |

## Palaeontology and Archaeology

|                                                                                                                                                 |                      |
|-------------------------------------------------------------------------------------------------------------------------------------------------|----------------------|
| Specimen provenance                                                                                                                             | <input type="text"/> |
| Specimen deposition                                                                                                                             | <input type="text"/> |
| Dating methods                                                                                                                                  | <input type="text"/> |
| <input type="checkbox"/> Tick this box to confirm that the raw and calibrated dates are available in the paper or in Supplementary Information. |                      |
| Ethics oversight                                                                                                                                | <input type="text"/> |

Note that full information on the approval of the study protocol must also be provided in the manuscript.

## Animals and other research organisms

Policy information about [studies involving animals](#); [ARRIVE guidelines](#) recommended for reporting animal research, and [Sex and Gender in Research](#)

|                         |                      |
|-------------------------|----------------------|
| Laboratory animals      | <input type="text"/> |
| Wild animals            | <input type="text"/> |
| Reporting on sex        | <input type="text"/> |
| Field-collected samples | <input type="text"/> |
| Ethics oversight        | <input type="text"/> |

Note that full information on the approval of the study protocol must also be provided in the manuscript.

## Clinical data

Policy information about [clinical studies](#)

All manuscripts should comply with the ICMJE [guidelines for publication of clinical research](#) and a completed [CONSORT checklist](#) must be included with all submissions.

|                             |                      |
|-----------------------------|----------------------|
| Clinical trial registration | <input type="text"/> |
| Study protocol              | <input type="text"/> |
| Data collection             | <input type="text"/> |
| Outcomes                    | <input type="text"/> |

## Dual use research of concern

Policy information about [dual use research of concern](#)

### Hazards

Could the accidental, deliberate or reckless misuse of agents or technologies generated in the work, or the application of information presented in the manuscript, pose a threat to:

| No                                  | Yes                      |                            |
|-------------------------------------|--------------------------|----------------------------|
| <input checked="" type="checkbox"/> | <input type="checkbox"/> | Public health              |
| <input checked="" type="checkbox"/> | <input type="checkbox"/> | National security          |
| <input checked="" type="checkbox"/> | <input type="checkbox"/> | Crops and/or livestock     |
| <input checked="" type="checkbox"/> | <input type="checkbox"/> | Ecosystems                 |
| <input checked="" type="checkbox"/> | <input type="checkbox"/> | Any other significant area |

### Experiments of concern

Does the work involve any of these experiments of concern:

| No                                  | Yes                      |                                                                             |
|-------------------------------------|--------------------------|-----------------------------------------------------------------------------|
| <input checked="" type="checkbox"/> | <input type="checkbox"/> | Demonstrate how to render a vaccine ineffective                             |
| <input checked="" type="checkbox"/> | <input type="checkbox"/> | Confer resistance to therapeutically useful antibiotics or antiviral agents |
| <input checked="" type="checkbox"/> | <input type="checkbox"/> | Enhance the virulence of a pathogen or render a nonpathogen virulent        |
| <input checked="" type="checkbox"/> | <input type="checkbox"/> | Increase transmissibility of a pathogen                                     |
| <input checked="" type="checkbox"/> | <input type="checkbox"/> | Alter the host range of a pathogen                                          |
| <input checked="" type="checkbox"/> | <input type="checkbox"/> | Enable evasion of diagnostic/detection modalities                           |
| <input checked="" type="checkbox"/> | <input type="checkbox"/> | Enable the weaponization of a biological agent or toxin                     |
| <input checked="" type="checkbox"/> | <input type="checkbox"/> | Any other potentially harmful combination of experiments and agents         |

## Plants

|                       |                                                                                                                                                                                                                                                                                                                                                                      |
|-----------------------|----------------------------------------------------------------------------------------------------------------------------------------------------------------------------------------------------------------------------------------------------------------------------------------------------------------------------------------------------------------------|
| Seed stocks           | <input type="text" value="The seeds involved in this study are all stored in the Ding's laboratory."/>                                                                                                                                                                                                                                                               |
| Novel plant genotypes | <input type="text" value="A near-isogenic line (NIL) in the HJX74 background that carries the japonica DNR1 allele from IRAP9, generated by crossing with HJX74 for at least 8 generation. The dnr1 mutation was generated by SRISPR/Cas9, which resulted in a 2-bp deletion in the second exon of DNR1 and therefore likely to disrupt its normal gene function."/> |
| Authentication        | <input type="text" value="Using qPCR and western-blotting to verify the DNR1 loss of function mutation."/>                                                                                                                                                                                                                                                           |

## ChIP-seq

### Data deposition

- Confirm that both raw and final processed data have been deposited in a public database such as [GEO](#).
- Confirm that you have deposited or provided access to graph files (e.g. BED files) for the called peaks.

Data access links

*May remain private before publication.*

Files in database submission

Genome browser session

(e.g. [UCSC](#))

### Methodology

Replicates

Sequencing depth

Antibodies

Peak calling parameters

Data quality

Software

## Flow Cytometry

### Plots

Confirm that:

- The axis labels state the marker and fluorochrome used (e.g. CD4-FITC).
- The axis scales are clearly visible. Include numbers along axes only for bottom left plot of group (a 'group' is an analysis of identical markers).
- All plots are contour plots with outliers or pseudocolor plots.
- A numerical value for number of cells or percentage (with statistics) is provided.

### Methodology

Sample preparation

Instrument

Software

Cell population abundance

Gating strategy

- Tick this box to confirm that a figure exemplifying the gating strategy is provided in the Supplementary Information.

## Magnetic resonance imaging

### Experimental design

Design type

Design specifications

Behavioral performance measures

## Acquisition

Imaging type(s) Field strength Sequence & imaging parameters Area of acquisition Diffusion MRI  Used  Not used

## Preprocessing

Preprocessing software Normalization Normalization template Noise and artifact removal Volume censoring 

## Statistical modeling & inference

Model type and settings Effect(s) tested Specify type of analysis:  Whole brain  ROI-based  BothStatistic type for inference (See [Eklund et al. 2016](#))Correction 

## Models & analysis

n/a | Involved in the study

  Functional and/or effective connectivity  Graph analysis  Multivariate modeling or predictive analysisFunctional and/or effective connectivity Graph analysis Multivariate modeling and predictive analysis
